1 **Title: Single-cell lineage trajectories and chromatin regulators that initialize antiviral CD8 T cell**  
2 **ontogeny**

3

4 **Authors:** Huitian Diao<sup>1,2</sup>, Runqiang Chen<sup>1,3,†</sup>, Shanel M. Tsuda<sup>1,2</sup>, Dapeng Wang<sup>1,†</sup>, Megan A.  
5 Frederick<sup>1,†</sup>, Jihye Kim<sup>1</sup>, Pabalu P. Karunadharm<sup>4</sup>, Gustavo Martinez<sup>4,†</sup>, Adam J. Getzler<sup>1,2</sup>, Clara  
6 Toma<sup>5</sup>, Justin J. Milner<sup>5,†</sup>, Thomas C. Venables<sup>1</sup>, Donna M. Martin<sup>6</sup>, Ananda W. Goldrath<sup>5</sup>, Shane Crotty<sup>3</sup>  
7 and Matthew E. Pipkin<sup>1,2</sup> \*

8 **Affiliations:**

9 <sup>1</sup> Department of Immunology and Microbiology, The Scripps Research Institute, Jupiter, FL, USA

10 <sup>2</sup> The Skaggs Graduate School of Chemical and Biological Sciences, The Scripps Research Institute,  
11 Jupiter, FL, USA

12 <sup>3</sup> Division of Vaccine Discovery, La Jolla Institute for Immunology, La Jolla, CA.

13 <sup>4</sup> Genomics Core, The Scripps Research Institute, Jupiter, FL, USA

14 <sup>5</sup> Division of Biological Sciences, University of California, San Diego, La Jolla, California, USA.

15 <sup>6</sup> Department of Pediatrics, University of Michigan, Ann Arbor, MI, USA.

16 \*Correspondence to: [mpipkin@scripps.edu](mailto:mpipkin@scripps.edu)

17 †Additional author notes should be indicated with symbols (for example, for current addresses).

18 **Abstract:** Individual naive CD8 T cells activated in lymphoid organs differentiate into functionally  
19 diverse and anatomically distributed T cell phylogenies in response to intracellular microbes. During  
20 infections that resolve rapidly, including live viral vaccines<sup>1</sup>, distinct effector ( $T_{\text{EFF}}$ ) and memory ( $T_{\text{MEM}}$ )  
21 cell populations develop that ensure long term immunity<sup>2</sup>. During chronic infections, responding cells  
22 progressively become dysfunctional and “exhaust”<sup>3</sup>. A diverse taxonomy of  $T_{\text{EFF}}$ ,  $T_{\text{MEM}}$  and exhausted  
23 ( $T_{\text{EX}}$ ) CD8 T cell populations is known, but the initial developmental basis of this phenotypic variation  
24 remains unclear<sup>4-10</sup>. Here, we defined single-cell trajectories and identified chromatin regulators that  
25 establish antiviral CD8 T cell heterogeneity using unsupervised analyses of single-cell RNA dynamics<sup>11-13</sup>  
26 and an *in vivo* RNAi screen<sup>14</sup>. Activated naive cells differentiate linearly into uncommitted effector-  
27 memory progenitor (EMP) cells, which initially branch into an analogous manifold during either acute or  
28 chronic infection. Disparate RNA velocities in single EMP cells initiate divergence into stem, circulating,  
29 and tissue-resident memory lineages that generate diverse  $T_{\text{MEM}}$  and  $T_{\text{EX}}$  precursor states in specific  
30 developmental orders. Interleukin-2 receptor (IL-2R) signals are essential for formation and  
31 transcriptional heterogeneity of EMP cells, and promote trajectories toward  $T_{\text{EFF}}$  rather than  $T_{\text{EX}}$  states.  
32 Nucleosome remodelers *Smarca4* and *Chd7* differentially promote transcription that delineates divergent  
33  $T_{\text{MEM}}$  lineages before cooperatively driving terminal  $T_{\text{EFF}}$  cell differentiation. Thus, the lineage  
34 architecture is established by specific chromatin regulators that stabilize diverging transcription in  
35 uncommitted progenitors.

### 36 **Main Text:**

37 To clarify the initial origins of T cell memory we generated longitudinal single-cell RNA-  
38 sequencing (scRNA-seq) datasets and used unsupervised methods to map single-cell trajectories that  
39 developed from naive CD8 T cells specific for *Lymphocytic choriomeningitis virus* (LCMV) early after  
40 infection of wildtype mice with strains that cause either an acute (Armstrong, LCMV<sub>Arm</sub>), or chronic  
41 (Clone 13, LCMV<sub>Cl13</sub>) infection (fig S1A-B)<sup>15</sup>. On days and 8 post infection (pi), clonal TCR transgenic  
42 P14 cells that had been adoptively transferred and endogenous polyclonal MHC-I tetramer-reactive CD8  
43 T cells (GP33<sup>+</sup>), which both recognize the LCMV epitope GP<sub>33-41</sub> in MHC H-2D<sup>b</sup>, were isolated from the  
44 spleens of the same host mice, and libraries were generated in parallel with fresh naive CD8 T cells  
45 purified from separate P14 mice. Individual naive cells are recruited into the response over the first ~ 3  
46 days following primary infection<sup>16</sup>. Due to this asynchrony, we anticipated the time-series sampling  
47 would encompass multiple developmental states that compose initial antiviral CD8 T cell ontogeny.

48 Dimensionality reduction and Louvain cluster extraction of cells was performed on all samples  
49 simultaneously using similar numbers of randomly sampled cells from each experimental group to limit  
50 potential biological biases arising from changes in subset compositions at different time points, and the  
51 data are represented in the two-dimensional PAGA initialized force-directed (FA) embedding (**Fig 1A**

52 and fig S1B)<sup>17,18</sup>. Partition-based graph abstraction (PAGA) inferred single-cell paths based on  
53 correlations between clusters<sup>13</sup>, which were numbered according to pseudotime (P0-P10) to define a  
54 potential developmental order (**Fig 1A-B**, Table S1). As expected, naive cells (P0) clustered apart from all  
55 activated cells, which separated into multiple clusters (P1-P10) (**Fig 1A** and fig S1C-D) and the  
56 pseudotime arrangement correctly predicted the actual time dependent emergence of cells in specific  
57 clusters (naive, vs days 5 and 8 pi) (**Fig 1C**, S1C-D and Table S1). The distribution of P14 and GP33<sup>+</sup>  
58 CD8 T cells among the clusters was similar in LCMV<sub>Arm</sub>-infected mice (fig S1D and E). P14 cells  
59 isolated from LCMV<sub>Arm</sub> and LCMV<sub>Cl13</sub> infected hosts were distributed in similar clusters on day 5 pi, but  
60 contributed differentially to clusters on day 8 pi (**Fig 1C** and fig S2D and E). Cellular identities of the  
61 clusters were imputed using gene set enrichment analysis (GSEA) and “subtractive” gene expression  
62 signatures extracted from published bulk-RNA-seq data derived from phenotypically defined CD8 T cell  
63 subsets<sup>19,20</sup> (Table S2, [https://github.com/TCellResearchTeam/T\\_cell\\_signature\\_Reference](https://github.com/TCellResearchTeam/T_cell_signature_Reference)). All major  
64 T<sub>EFF</sub>, T<sub>MEM</sub>, T<sub>EX</sub> and naive cell signatures were strongly enriched (p-val <0.05, NES) in at least one  
65 Louvain cluster (**Fig 1D** and fig S1 J-M), and demonstrated that cells corresponding to all mature T<sub>EFF</sub>,  
66 T<sub>MEM</sub> and T<sub>EX</sub> cell gene expression states arise within 8 days following acute or chronic LCMV infection.  
67 The PAGA-inferred paths between these states facilitated precisely defining developmentally regulated  
68 gene expression at the single-cell level, which extends previous longitudinal studies of bulk populations  
69 during acute infection<sup>21</sup>.

70

## 71 **Naive CD8 T cells differentiate along a linear path into common effector and memory progenitor** 72 **(EMP) cells**

73 The unsupervised approach clarified the initial developmental relationship of T<sub>MEM</sub>, T<sub>EFF</sub>, and T<sub>EX</sub>  
74 cells in an unbiased fashion (**Fig 1B**). Naive cells (P0) were connected to cells in cluster P2, via activated  
75 intermediates (P1 cells, **Fig 1E** and Table S1). P2 cells were positively enriched with gene expression of  
76 recent TCR stimulation (48h Act up, p = 0.004, NES = 2.1). P4 cells were negatively enriched with this  
77 signature (fig S1K), and both GSEA and pseudotime indicated P4 cells were more developmentally  
78 advanced than those in P2, and were therefore downstream (fig S1J, Best clusters 2, 8 and 10). Thus,  
79 activated naive cells appeared to initially develop along a linear pathway into P2 cells.

80 Transcriptionally heterogeneous cell clusters on day 5 emerged from P2 cells, which strongly  
81 expressed *Il2ra* (encodes CD25/IL-2R $\alpha$ , a subunit of the trimeric interleukin-2 receptor that initiates high-  
82 affinity IL-2 binding<sup>22,23</sup>) and were positively enriched with signatures of both central memory (T<sub>CM</sub>) and  
83 naive cells, but not those of mature effector memory (T<sub>EM</sub>), memory stem (T<sub>SCM</sub>), resident memory (T<sub>RM</sub>)  
84 or terminal effector (TE) cells (**Fig 1D** and fig S1L). P2 cells highly expressed a mixture of genes

85 encoding TFs whose cognate motifs are enriched within *cis*-acting regions that gain *de novo* chromatin  
86 accessibility during primary TCR stimulation (*Runx3*, *Batf*, *Irf4*, *Prdm1*, *Klf2*), and that are essential for  
87 both T<sub>EFF</sub> and T<sub>MEM</sub> cell development<sup>24,25</sup>(fig S1G and H). In addition, genes encoding multiple regulatory  
88 factors whose expression is highly differential in established mature TE/T<sub>EM</sub> (*Tbx21*, *Zeb2*, *Id2*, *Prdm1*),  
89 T<sub>CM</sub>/T<sub>SCM</sub>/T<sub>EX</sub><sup>prog1</sup> (*Tcf7*, *Zeb1*, *Bach2*, *Id3*), T<sub>RM</sub> (*Hmnr*, *Aurkb*, *Prdm1*) and T<sub>EX</sub><sup>term</sup> (*Tox*, *Lag3*, *Cd160*)  
90 populations<sup>26,27</sup> were coordinately expressed at intermediate levels in P2 cells (fig S1G and H). These  
91 “lineage-specific” genes were significantly upregulated or downregulated in cells from clusters at the  
92 distal tips of the paths (P10, P7, P3 and P8) compared to P2 cells (**Fig 1E**, fig S1G and H and Table S1),  
93 implying P2 cells promiscuously express regulatory factors that become progressively lineage-restricted.  
94 Flow cytometry confirmed that activated naive cells exhibited uniform behavior while undergoing  
95 extensive cell division, upregulating CD25 and maintaining expression of T<sub>CM</sub> cell attributes (CD27 and  
96 Tcf1 expression), before developing phenotypic features of more mature T<sub>EFF</sub> cells (e.g., high Blimp1-  
97 YFP and KLRG1 expression) (**Fig 1F**). These divergent subsets emerged near the final detectable cell  
98 division from cells highly expressing both CD25 and the naive and T<sub>CM</sub>-associated TF Tcf1 (fig S1I).  
99 Thus, naive cells initially differentiate in a linear path into cells that manifest multilineage gene  
100 expression, a hallmark of multipotency and cells undergoing lineage-choice<sup>28,29</sup>. On this basis, we  
101 classified cells in cluster P2 as common effector/memory progenitor (EMP<sup>P2</sup>) cells.

102

### 103 **Disparate RNA velocities develop in individual EMP cells and initiate a branched manifold that** 104 **establishes T<sub>MEM</sub> and T<sub>EX</sub> cell diversity**

105 Strong connections of EMP<sup>P2</sup> cells with clusters arranged immediately downstream implied the  
106 initial branchpoints of four developmental paths (**Fig 1B**). To define the trajectories of cells from each  
107 cluster in the PAGA-inferred architecture, their future states were modeled using RNA velocity<sup>11,12</sup> (**Fig**  
108 **2A**). Nascent RNA expression precedes accumulation of their mature mRNAs by several hours, and RNA  
109 velocity describes the rates at which cells are transitioning into new states based on the gene-wise ratios  
110 in expression of nascent (i.e. unspliced) to mature (i.e., spliced) mRNAs genome-wide. Streamline plots  
111 after UMAP embedding of all samples from each infection depicted transition probability data derived  
112 from the grid average RNA velocities between single-cell clusters (**Fig 2A** and fig S2A), and defined  
113 future cell states in the lineage architecture (**Fig 2B** and **2C** fig S2A). Strongly divergent RNA velocities  
114 in P2 and P5 cells confirmed they were developmental roots in each infectious context (fig S2B). The  
115 RNA velocities of signature genes associated with multiple distinct CD8 T cell states (e.g., naive and  
116 T<sub>SCM</sub> cells: *Id3*, *Tcf7* and *Sell*; and TE cells: *Prdm1*, *Id2*, *Tbx21* and *Zeb2*) were all positive in EMP<sup>P2</sup> cells  
117 during LCMV<sub>Arm</sub> infection (**Fig 2E**, Table S5). This indicates that multilineage gene transcription in

118 rapidly dividing EMP<sup>P2</sup> cells establishes the transition potential into diverse future cell states, prior to  
119 developmental branching and mature lineage-specific mRNA expression. Conversely, cells in cluster P10  
120 during LCMV<sub>Arm</sub> infection, and clusters P7 and P8 during LCMV<sub>Cl13</sub> infection, lacked RNA velocities  
121 into other clusters indicating they were terminal states in the analysis (fig S2C).

122 Trajectory 1 (T1: P2->P4->P9->P10) only formed in LCMV<sub>Arm</sub>-infected mice and defined  
123 formation of cells enriched with signatures of bulk T<sub>EM</sub> cells (effector memory precursors, pT<sub>EM</sub><sup>P4</sup>),  
124 classical KLRG1<sup>lo</sup> CD127<sup>lo</sup> early effector cells (EE<sup>P9</sup>) and KLRG1<sup>hi</sup> CD127<sup>lo</sup> terminal effector (TE) cells  
125 (TE<sup>P10</sup>) (**Fig 2C-D**, fig S1K and M). RNA velocity-derived transition probabilities indicated most EE<sup>P9</sup>  
126 cells proceed toward TE<sup>P10</sup> cells (**Fig 2B**). Positive *Tbx21* RNA velocity was sustained and *Zeb2* velocity  
127 accelerated in EE<sup>P9</sup> cells, followed by increased expression of mature *Tbx21* and *Zeb2* mRNAs in TE<sup>P10</sup>  
128 cells, whose velocities continued to increase in TE<sup>P10</sup> cells<sup>30-32</sup> (**Figs 2D-E** and fig S2D and Table S5).  
129 Thus, the initial developmental order of T<sub>CIRC</sub> cells during acute LCMV infection is T<sub>CM</sub> to T<sub>EM</sub> to TE  
130 cells.

131 Trajectory 2 (T2: P2>P5>P3) is likely a main source of T<sub>RM</sub> precursor cells (pT<sub>RM</sub><sup>P3</sup>) during  
132 LCMV<sub>Arm</sub> infection, and exhausted progenitor 2 (T<sub>EX</sub><sup>prog2-P3</sup>) cells<sup>33</sup> during LCMV<sub>Cl13</sub> infection. In  
133 LCMV<sub>Arm</sub>-infected hosts, P5 cells were positively enriched with signatures of bulk KLRG1<sup>hi</sup>CD127<sup>hi</sup>  
134 “double positive” (DP) effector and T<sub>RM</sub> cells, and were classified as DP<sup>P5</sup> cells (**Fig 1D** and fig S1K).  
135 DP<sup>P5</sup> cells diverged into pT<sub>RM</sub><sup>P3</sup> cells, pT<sub>EM</sub><sup>P4</sup> cells, and cells enriched with the bulk signature of classical  
136 KLRG1<sup>lo</sup>CD127<sup>hi</sup> memory precursor (MP) cells (MP<sup>P6</sup>) (**Figs 1B and 2A-C** and fig S1K-L). Runx3-  
137 dependent gene expression was positively enriched in DP<sup>P5</sup> and MP<sup>P6</sup> (fig S1K and S2F), consistent with  
138 the requirement of Runx3 for development of these cell states<sup>25,34</sup>, and divergence into pT<sub>RM</sub><sup>P3</sup> cells  
139 correlated with increased expression of the representative T<sub>RM</sub> signature gene *Hmmr* (**Fig 2B-D**, and fig  
140 S1H). In LCMV<sub>Cl13</sub>-infected hosts P5 cells were also enriched with signatures of DP and T<sub>RM</sub> cells,  
141 however, they were classified as T<sub>EX</sub><sup>prog2-P5</sup> cells because they were positively enriched with the signatures  
142 of both T<sub>EX</sub><sup>prog2</sup> and T<sub>EX</sub> cells (**Fig 1D** and fig S1L-M). In addition, cluster P3 cells were enriched with  
143 both T<sub>RM</sub> and T<sub>EX</sub><sup>prog2</sup> signatures, and were classified as T<sub>EX</sub><sup>prog2-P3</sup> cells, but were distinct from T<sub>EX</sub><sup>prog2-P5</sup>  
144 cells because they lacked TCR-stimulated gene expression (fig S1K-L). The T<sub>EX</sub> signature was not  
145 strongly enriched in either DP<sup>P5</sup> or pT<sub>RM</sub><sup>P3</sup> cells from LCMV<sub>Arm</sub>-infected mice, which confirmed their  
146 distinction from homologous cells during chronic infection which were and that strongly expressed *Tox*<sup>35-  
147 37</sup> (**Figs 1D and 2E**, and fig S1M).

148 Trajectory 3 (T3: P2>P6>P8) explained initial development of intermediately exhausted (T<sub>EX</sub><sup>int</sup>)  
149 and terminally exhausted cells (T<sub>EX</sub><sup>term</sup>) during LCMV<sub>Cl13</sub> infection, and formation of classical MP cells  
150 during LCMV<sub>Arm</sub> infection (**Fig 2C**). In LCMV<sub>Arm</sub>-infected hosts, MP<sup>P6</sup> cells were enriched with MP and

151 EE cell signatures and had transition potential into  $EE^{P9}$  cells, providing an alternative conduit into the T1  
152 trajectory (**Fig 2A-C**, fig S1K-M), and demonstrated classical MP cells are most likely distinct from  
153 precursors of  $T_{SCM}$  (see below). P6 cells from  $LCMV_{C113}$ -infected were classified as  $T_{EX}^{int-P6}$  cells because  
154 they manifested signatures of both intermediately exhausted ( $T_{EX}^{int}$ ) and  $T_{EX}$  cells, and flowed directly  
155 into cluster P8 cells (**Fig 2A-D**), which were designated  $T_{EX}^{term-P8}$  cells because they were strongly  
156 enriched with the  $T_{EX}^{term}$  cell signature (**Fig 1D**, fig S1M) and highly expressed *Tox*, *Pdcd1* and *Lag3* (**Fig**  
157 **1E and G**). Thus,  $T_{EX}^{int}$  cells are related to classical MP cells, but exhibit altered transition probabilities  
158 into terminal states and fail to establish the  $T_{CIRC}$  lineage during  $LCMV_{C113}$  infection (**Fig 2B-D** and fig  
159 S2C).

160 Trajectory 4 (T4: P2> P7) defined formation of precursors of  $T_{SCM}$ -like cells during acute  
161 ( $T_{SCM}^{P7}$ ) or chronic ( $T_{EX}^{prog1-P7}$ ) LCMV infection (**Fig 2C**).  $T_{SCM}^{P7}$  cells from  $LCMV_{Arm}$ -infected hosts  
162 were positively enriched with  $T_{SCM}$  and  $T_{CM}$  cell signatures, and were strongly connected to  $pT_{EM}^{P4}$  and  
163  $EE^{P9}$  cells (**Fig 1D** and fig S1J-K). Both  $T_{SCM}^{P7}$  and  $pT_{EM}^{P4}$  cells exhibited strong *Tbx21* RNA velocity,  
164 suggesting they both manifest transition potential into *Tbx21* expressing states. Consistent with this, cells  
165 in both clusters exhibited strong transition probabilities into  $EE^{P9}$  cells, indicating that  $T_{SCM}$  precursors  
166 during  $LCMV_{Arm}$  infection are poised with  $T_{EFF}$  cell potential. In contrast, although  $T_{EX}^{prog1-P7}$  cells from  
167  $LCMV_{C113}$ -infected hosts were positively enriched with the  $T_{SCM}$  signature, they exhibited reduced *Tbx21*  
168 RNA velocity (Table S5), and lacked transition probability into  $EE^{P9}$  cells (**Fig 2B**). In addition,  $T_{EX}^{prog1-P7}$   
169 cells appeared to derive from  $EMP^{P2-C113}$  cells initially, but their strong accumulation by day 8 pi  
170 correlated with retrograde transition potentials from all downstream  $T_{EX}$  cell clusters except  $T_{EX}^{prog2-P3}$   
171 cells, whereas during  $LCMV_{Arm}$  infection,  $T_{SCM}^{P7}$  cells derived predominantly from  $EMP^{P2}$  cells (**Fig 2B-**  
172 **D**). Moreover,  $T_{EX}^{prog1-P7}$  cells more strongly induced *Tcf7* (**Fig 2D**), highly expressed *Lag3*, *Pdcd1*, *Tox*,  
173 *Tox2* and *Bcl6*, were positively enriched with the specific  $T_{EX}$  cell signature and were enriched with  
174 terminal states (**Fig 1D** and figs S1H, M and S2C). Thus, the precursors of  $T_{SCM}$  cell states during acute  
175 and chronic infections have different origins and distinct developmental potentials.

## 176 IL-2R-dependent transcription establishes EMP cells and transcriptional heterogeneity

177 The most dynamic genes drive the RNA velocity vector field<sup>11,12</sup>. Those encoding TFs, CRFs,  
178 and surface receptors (SRs) during transitions between clusters were identified as potential drivers that  
179 compose the antiviral CD8 T cell architecture (**Fig 2C** and fig S2D-E, Table S4). Strong *Il2ra* dynamics  
180 and its transiently high expression in  $EMP^{P2}$  cells indicated IL-2R-dependent signals might promote  
181 multilineage potential (**Fig 3A and B**). To define the role of *Il2ra* functionally, single cell trajectories  
182 were inferred after scRNA-seq analysis of wildtype and *Il2ra*-deficient P14 (P14 *Il2ra*<sup>-/-</sup>) CD8 T cells 6  
183 days after  $LCMV_{Arm}$  infection (**Fig 3C and D**, as described fig S1B). This second analysis confirmed the

184 original lineage architecture during LCMV<sub>Arm</sub> infection (**Fig 3C** and refer to **Fig 1A**). Louvain clusters  
185 from the *Il2ra* analysis (designated “Exp-*Il2ra*”) closely matched most clusters identified on days 5 and 8  
186 pi in the original analyses (**Fig 3D** and refer to **Fig 1**). PAGA-inferred connectivity and RNA velocities  
187 implied analogous intracluster transition probabilities (**Fig 3C and E**), and analogous single cell behavior  
188 of wildtype P14 cells in both the original and Exp-*Il2ra* analyses emphasized that the inferred lineage  
189 architecture is biologically robust.

190 P14 *Il2ra*<sup>-/-</sup> CD8 T cells distributed within the trajectories aberrantly compared to WT P14 cells.  
191 P14 *Il2ra*<sup>-/-</sup> cells almost entirely composed cluster Exp-*Il2ra*<sup>P1</sup> compared to wildtype P14 cells indicating  
192 they arrested before transition into EMP<sup>P2</sup> cells (Exp-*Il2ra*<sup>P2</sup>) (**Fig 3F** and fig S3E, p-value 1.35 x 10<sup>-27</sup>).  
193 Exp-*Il2ra*<sup>P1</sup> cells were activated (data not shown), but lacked RNA velocity into future states indicating  
194 they were terminal (fig S3D). Strong differential expression between Exp-*Il2ra*<sup>P1</sup> and Exp-*Il2ra*<sup>P2</sup> cells  
195 confirmed *Il2ra* was essential for transition into EMP<sup>P2</sup> cells (**Fig 3I**). In addition, differential expression  
196 between wildtype and *Il2ra*<sup>-/-</sup> P14 cells in cluster Exp-*Il2ra*<sup>P2</sup> confirmed IL-2 signaling was required for  
197 EMP cell formation (fig S3G). This required IL-2R-dependent transcription, because genes whose nascent  
198 RNA expression required *Il2ra* for upregulation after TCR stimulation (WT<sup>48h</sup> > WT<sup>naive</sup>, padj < 0.05)  
199 were positively enriched with those upregulated as Exp-*Il2ra*<sup>P1</sup> transitioned into Exp-*Il2ra*<sup>P2</sup> cells (fig  
200 S3K, NES = 1.26, pvalue = 0.04), whereas genes that required *Il2ra* for downregulation (WT<sup>48h</sup> > *Il2ra*<sup>-/-</sup>  
201 <sup>48h</sup>, padj < 0.05) were positively enriched with those downregulated in this transition (fig S3K, NES = -  
202 1.16, pvalue = 0.05). Thus, IL-2R-dependent transcription *in vivo* is essential for gene expression that  
203 drives activated naive cells to become EMP<sup>P2</sup> cells.

204 Development beyond the EMP<sup>P2</sup> cell state also required IL-2R signals. The transition  
205 probabilities of P14 *Il2ra*<sup>-/-</sup> cells into other clusters were substantially altered (**Fig 3E**). *Il2ra*<sup>-/-</sup> cells in  
206 cluster Exp-*Il2ra*<sup>P2</sup> lacked transition potential (**Fig 3E**). Those from cluster Exp-*Il2ra*<sup>P4</sup> did not manifest  
207 velocity into Exp-*Il2ra*<sup>P5</sup> (T<sub>RM</sub>) cells, and those in Exp-*Il2ra*<sup>P5</sup> were vectored backward into cluster Exp-  
208 *Il2ra*<sup>P2</sup> (**Fig 3E**). Consistent with this, P14 *Il2ra*<sup>-/-</sup> cells were depleted from cluster Exp-*Il2ra*<sup>P5</sup> cells  
209 (pT<sub>RM</sub><sup>P3</sup> analog) (**Fig 3F** and fig S3E, p-value 0.057), and those that did accumulate in that cluster were  
210 negatively enriched with the T<sub>RM</sub>-signature compared to wildtype P14 Exp-*Il2ra*<sup>P5</sup> cells (fig S3F). Thus,  
211 *Il2ra*<sup>-/-</sup> P14 cells that bypassed the initial developmental block inefficiently formed putative T<sub>RM</sub>  
212 precursors. In addition, *Il2ra*<sup>-/-</sup> cells in cluster Exp-*Il2ra*<sup>P4</sup> manifested retrograde vectors into Exp-*Il2ra*<sup>P3</sup>  
213 (T<sub>SCM</sub>) cells, unlike wildtype P14 cells (**Fig 3E**), which correlated with increased P14 *Il2ra*<sup>-/-</sup> cell  
214 representation in cluster Exp-*Il2ra*<sup>P3</sup> (T<sub>SCM</sub><sup>P7</sup> analogs) (**Fig 3F** and fig S3E, p-value 0.00042). Furthermore,  
215 *Il2ra*-deficient cells inefficiently repressed T<sub>SCM</sub> signature genes after TCR stimulation (fig S3J). These

216 results demonstrate that IL-2R signals promote divergent transcription in EMP cells that establishes  
217 trajectories into branching T<sub>MEM</sub> cell lineages.

218 The bias of EMP-like *Il2ra*<sup>-/-</sup> cells toward T<sub>SCM</sub>-like states and their reduced contribution to other  
219 T<sub>MEM</sub> precursor states during acute infection prompted examining IL-2R-regulated genes in EMP<sup>P2</sup> cells  
220 from LCMV<sub>Cl13</sub>-infected mice. EMP<sup>P2</sup> cells during LCMV<sub>Cl13</sub> infection less highly expressed IL-2R-Stat5  
221 induced genes (*Batf3*, *Ccr5*, *Gzmb*, *Chd7* see below) that promote formation of protective T<sub>EFF</sub> and T<sub>MEM</sub>  
222 cells (fig. S3L). The IL-2R-repressed gene signature was enriched with genes whose RNA velocity was  
223 greater in EMP<sup>P2</sup> cells from LCMV<sub>Cl13</sub>-infected mice (fig S3M). Moreover, in LCMV<sub>Cl13</sub> infection,  
224 T<sub>EX</sub><sup>progl-P7</sup> cells upregulated the IL-2R-repressed gene signature compared to EMP<sup>P2</sup> cells; whereas this  
225 signature was not upregulated as EMP<sup>P2</sup> transitioned to T<sub>SCM</sub><sup>P7</sup> cells during LCMV<sub>Arm</sub> infection (fig S3M).  
226 Thus, regulation of IL-2R-dependent genes appear to bias the future states of EMP<sup>P2</sup> cells during acute  
227 and chronic infection.

228

## 229 **Differential utilization of CRFs establishes antiviral CD8 T cell heterogeneity**

230 Chromatin structure in naive cells is remodeled during initial TCR and IL-2 stimulation and  
231 becomes stably differential in distinct T<sub>EFF</sub>, T<sub>MEM</sub> and T<sub>EX</sub> cell subsets<sup>38</sup>. To identify chromatin regulatory  
232 factors (CRFs) that might control diverging transcriptional programs during T<sub>EFF</sub> and T<sub>MEM</sub> cell formation  
233 we screened a library of retrovirally delivered microRNA-embedded short hairpin RNAs (shRNAmirs)  
234 targeting nearly all murine CRF genes using a pooled approach in P14 CD8 T cells responding to  
235 LCMV<sub>Arm</sub> infection (fig S4A and B, **Fig 5A** and Table S7)<sup>14</sup>. Candidate CRFs were identified by  
236 sequencing DNA libraries amplified from integrated shRNAmir proviral sequences in FACS-purified  
237 CD8 T cell subsets and quantifying differential shRNAmir representation (RNAi-induced effects) (**fig**  
238 **S4B**, <https://github.com/Yolanda-HT/HSAP>). Genes with top RNAi-effects (25<sup>th</sup> percentiles) affecting *in*  
239 *vivo* P14 cell accumulation (input vs output), maturation of KLRG1<sup>lo</sup> CD127<sup>lo</sup> cells into all other  
240 phenotypes (EE vs other), and the balance between TE and MP cells (KLRG1<sup>hi</sup>CD127<sup>lo</sup> vs  
241 KLRG1<sup>lo</sup>CD127<sup>hi</sup>) were selected as potential candidates (**Fig 4B-E** and Table S7). Individual follow-up  
242 experiments confirmed specific phenotypes of several top candidates that were previously unknown,  
243 including *Prmt5*, *Carm1*, *Taf1*, *Mll1* (manuscript in preparation) and multiple genes encoding factors in  
244 Brg1-associated factor (BAF, mammalian SWI/SNF)<sup>39</sup> and chromodomain helicase and DNA-binding  
245 (Chd) nucleosome remodeling complexes (**Fig 4B-D**). Thus, concerted activity of many CRFs



246 differentially control formation of classically defined populations defined by KLRG1 and CD127  
247 expression during acute viral infection.

248 We pursued *Smarca4* (Brg1) and *Chd7* (Chd7), which encode ATPases of nucleosome  
249 remodeling complexes that have essential roles in multipotent neural crest cells<sup>40</sup>, human development  
250 and immune system function<sup>41-43</sup>, and thymic T cell development<sup>44</sup>. Their strong phenotype in the screen  
251 and their dynamics in the single-cell trajectory, both implied they could have essential functions in EMP  
252 cells. Depletion of either factor alone impaired formation of KLRG1<sup>hi</sup> cells on day 5 pi, and increased the  
253 fractions of KLRG1<sup>lo</sup> CD127<sup>lo</sup> EE-like cells by day 8 pi, which suggested both factors might promote  
254 divergence into TE, DP or MP populations<sup>4</sup> (**Fig 5B**). In addition, RNAi-effects in the primary screen  
255 indicated *Smarca4* and at least 4 additional BAF subunits (*Arid1a*, *Smarcc1*, *Smarce1*) were selectively  
256 required for TE cell formation (**Fig 4C**). Four other BAF-subunits (*Actl6b*, *Smarcc2*, *Smarcd1*, and  
257 *Smarcd3*) were preferentially required for MP formation (**Fig 4C**). Thus, distinct BAF-complex  
258 assemblies might differentially bias TE and MP cell development<sup>39</sup>. To further confirm the role of Chd7,  
259 engineered *Chd7* alleles<sup>42</sup> were conditionally disrupted in mice using transgenic Cre expression in post-  
260 thymic T cells (referred to as *Chd7*<sup>fl/fl</sup> dLck-Cre sfYFP). Similar to RNAi, *Chd7* gene-disruption impaired  
261 the frequency of KLRG1<sup>hi</sup> cells 5 days after LCMV<sub>Arm</sub> infection (fig S4C), and reduced formation of TE  
262 cells while increasing frequencies of EE- and MP-like cells 8 days after infection, without strongly  
263 affecting overall T<sub>EFF</sub> cell numbers (**Fig 4E**). Thus, both BAF and Chd7 complexes are essential for the  
264 early phenotypic heterogeneity of T<sub>EFF</sub> cells during acute infection.

265

## 266 **Smarca4 and Chd7 are required for transcriptional heterogeneity of EMP cells**

267 Distinct RNA dynamics of *Smarca4* and *Chd7* in the trajectory implied sequential early functions  
268 during initial lineage divergence. Mature *Smarca4* mRNA expression was greatest in EMP<sup>P2</sup> cells, before  
269 *Chd7* RNA velocity increased in EMP<sup>P2</sup>, DP<sup>P5</sup> and MP<sup>P6</sup> cells (**Fig 4G**). Mature *Chd7* transcripts were  
270 upregulated in EE<sup>P9</sup> and TE<sup>P10</sup> cells (**Fig 4G**) and in bulk KLRG1<sup>hi</sup> cells on day 5 of LCMV<sub>Arm</sub> infection<sup>25</sup>.  
271 *Chd7* transcription required *Il2ra* during TCR stimulation (**Fig 3K**). These data are consistent with  
272 *Smarca4* and *Chd7* functioning in an IL-2R-dependent transcriptional network. To examine this  
273 possibility, P14 cells depleted of either *Smarca4* or *Chd7* were analyzed by RNA-seq 5 days after  
274 LCMV<sub>Arm</sub> infection. *Smarca4* was required to downregulate genes that are repressed by IL-2R (day 6),  
275 and to repress both the T<sub>SCM</sub> and *Tcf7*-promoted gene expression signatures<sup>21,25,36,45-47</sup> (**Fig 4H**), whereas  
276 *Chd7* was required for activation of genes that require IL-2R for expression at later times (day 10)<sup>46</sup> (**Fig**  
277 **4H**). In addition, both factors were necessary for promoting gene expression activated by the TF Runx3  
278 and repressing gene expression promoted by the TF Tox (**Fig 4H**). Thus, IL-2R-dependent transcriptional

279 heterogeneity that develops in EMP cells early during acute infection required both *Smarca4* and *Chd7*. In  
280 addition, the distinct requirements of each factor indicated they differentially promote transcription that  
281 drives divergence between T1 (pT<sub>EM</sub>), T2 (MP) and T4 (pT<sub>SCM</sub>) trajectories.

282 *Smarca4* and *Chd7* stabilized transcription that drives formation of the T1 trajectory. *Smarca4*-  
283 depleted P14 cells on day 5 pi expressed significantly less *Bhlhe40*, *Chd7*, *Gzma*, *Med12l*, *Runx3*, *Tbx21*  
284 and *Zeb2* (**Fig 4I, left**); *Chd7*-depleted cells expressed significantly less *Gzma*, *Il12rb2*, *Il18rap*, *Med12l*  
285 and *Zeb2*, while expression of *Bhlhe40*, *Batf3*, and *Tbx21* trended lower (**Fig 4I, right**). In P14 cells  
286 depleted of *Chd7*, T-bet protein expression and TE cell formation was more strongly impaired during  
287 LM<sub>GP33</sub> infection than during LCMV<sub>Arm</sub> infection, consistent with grossly impaired *Il12rb2* expression  
288 (**Fig 4I, right**), and the increased IL-12 concentrations during LM infection compared to LCMV  
289 infection<sup>30,48</sup> (**Fig 6J-K** and data not shown). Complementation of *Smarca4* or *Chd7* depleted P14 cells  
290 with retrovirally expressed *Tbx21* restored the normal pattern of TE and MP in each case (fig 4D and E),  
291 indicating they each promote T<sub>EM</sub> and TE differentiation by ensuring *Tbx21* expression. However,  
292 enforced T-bet expression in the absence of *Chd7* did not rescue defective *Gzmb* expression, indicating  
293 that *Chd7* is broadly required for cytolytic effector cell programming (data not shown). Because altered  
294 gene expression in the absence of *Smarca4* and *Chd7* is manifest on day 5 pi, prior to EE<sup>P9</sup> cell formation,  
295 these results demonstrate that both CRFs are necessary to establish T<sub>EFF</sub> gene expression prior to when  
296 cells with these phenotypes manifest.

297

### 298 ***Chd7* is essential for T<sub>MEM</sub> cell lineage branching**

299 P14 cells depleted of *Chd7* during LCMV<sub>Arm</sub> infection were positively enriched with gene  
300 expression signatures of DP<sup>P5</sup> and MP<sup>P6</sup> cells on day 5 pi, which correlated with increased frequencies of  
301 EE and MP-phenotype cells in *Chd7*<sup>fl/fl</sup> dLck-Cre sfYFP mice 8 days after LCMV<sub>Arm</sub> infection (**Fig 4F**).  
302 Thus, cells lacking *Chd7* appeared to arrest at the point where EMP<sup>P2</sup> cells undergo branching into MP<sup>P6</sup>  
303 and EE<sup>P9</sup> cells, well before maturation of TE<sup>P10</sup> cells, which brought into question whether they correctly  
304 stabilized the specific gene expression programs related to each of these flow cytometry phenotypes. To  
305 examine this directly, LCMV-specific CD8 T cells from *Chd7*<sup>+/+</sup> and *Chd7*<sup>fl/fl</sup> dLck-Cre<sup>+</sup> sfYFP<sup>+</sup> mice that  
306 exhibited MP, EE, DP and TE cell phenotypes 8 days after LCMV<sub>Arm</sub> infection were FACS-purified and  
307 analyzed using RNA-seq. Multidimensional scaling showed these populations from wildtype mice were  
308 separated from each other, whereas those from *Chd7*-deficient mice grouped (**Fig 4L**), indicating that  
309 gene expression states which diverged in wildtype T<sub>EFF</sub> subsets did not strongly diverge in the *Chd7*-  
310 deficient populations. Consistent with this interpretation, pairwise analysis showed that compared to  
311 wildtype cells, *Chd7*-deficient TE-phenotypic cells less strongly expressed genes encoding factors

312 characteristic of TE cells (*Zeb2*, *Med12l*, *Il18rap*, *Il12rb2*), and *Chd7*-deficient EE- or MP-phenotypic  
313 cells less highly expressed genes that promote MP cell development and formation of long-lived T<sub>MEM</sub>  
314 cells (*Tcf7*, *Id3*, *Tox*, and *Ccr7*) (**Fig 4M**). These results demonstrate that *Chd7* is necessary to stabilize  
315 divergent transcriptional programs that differentiates circulating T<sub>MEM</sub> lineage branches and maturing cell  
316 states, and promotes terminal T<sub>EFF</sub> maturation.

317

## 318 **Discussion**

319 Our study resolves the initial stages of antiviral CD8 T cell ontogenesis. The architecture  
320 indicates naive cells differentiate into common EMP cells which diverge along distinct trajectories that  
321 develop gene expression states within the first week of acute or chronic viral infection that match all  
322 major T<sub>EFF</sub>, T<sub>MEM</sub> and T<sub>EX</sub> cell populations found at later times. Additional developmental paths to cells  
323 that were not sampled in this analysis could exist (e.g., cells from other tissues)<sup>49,50</sup>. Variable RNA  
324 velocities that develop in EMP cells indicates that diverging transcription initiates the branching  
325 trajectories before strong differential expression of lineage-specific regulators is established. IL-2R  
326 signals were required for EMP cell development and their transcriptional heterogeneity, and altered IL-  
327 2R-dependent transcription in EMP cells during chronic infection correlated with development of T<sub>EX</sub> cell  
328 states. Because *Il2ra* is regulated by IL-2 stimulation and was dynamic during EMP cell formation and  
329 divergence, these results suggest variable IL-2 stimulation contributes to initial lineage bias of cells in the  
330 population.

331 We provide evidence that diverse T<sub>MEM</sub> cell types most likely arise from divergent precursor cell  
332 states derived from distinct lineages early in the response. The nucleosome remodeler *Smarca4* was  
333 necessary for gene expression that initially separates T<sub>SCM</sub> and T<sub>EM</sub> precursor states; *Chd7* functioned later  
334 to mature classical MP cells; and, both factors cooperatively promoted TE cell differentiation. These  
335 results provide evidence that diverging transcriptional states in EMP cells are stabilized by specific CRFs,  
336 and implies that chromatin remodeling reinforces initial lineage biases and establishes the branching  
337 architecture. Thus, differential chromatin remodeling in divergent T<sub>MEM</sub> cell precursor lineages might  
338 explain the preferential interconversion potentials of distinct mature T<sub>MEM</sub> cell populations<sup>1,51,52</sup>, and  
339 resistance of T<sub>EX</sub> cells to chromatin-level reprogramming<sup>53,54</sup>. The developmental architecture, stepwise  
340 transcriptional dynamics and CRF atlas described here suggests many factors with spatiotemporally  
341 resolved functions and might suggest strategies for engineering T<sub>MEM</sub> CD8 T cell formation.

## 342 **Methods**

### 343 **Mice**

344 Wildtype 6-8 week old C57BL/6J mice were used as recipients for adoptive transfer experiments  
345 and were purchased from the Jackson Laboratory. P14 Thy1.1<sup>+</sup> mice were a gift from Dr. Rafi Ahmed  
346 (Emory University). P14 Thy1.1<sup>+</sup> Thy1.2<sup>+</sup> mice were generated by crossing P14 Thy1.1<sup>+</sup> mice with  
347 wildtype C57BL/6J mice. P14 Thy1.1<sup>+</sup> *Il2ra*<sup>-/-</sup> mice were generated by crossing *Il2ra*<sup>-/-</sup> mice (purchased  
348 from Jackson Laboratory) with P14 Thy1.1<sup>+</sup> mice. *Chd7*<sup>fl/fl</sup> mice were a gift from Dr. Donna M. Martin  
349 (University of Michigan)<sup>42</sup>, and were crossed with Rosa26-EYFP and dLck-Cre (maintained  
350 heterozygous) transgenic mice. All mice were maintained in specific-pathogen free facilities and used  
351 according to protocols approved by the Institutional Animal Care and Use Committee of TSRI-FL.

352

### 353 **T cell activation, adoptive transfer and infections**

354 Naive P14 CD8<sup>+</sup> T cells from wildtype mice were isolated by negative selection (EasySep™,  
355 Stemcell Technologies). Naive P14 Thy1.1<sup>+</sup> *Il2ra*<sup>-/-</sup> cells were isolated from 4-5 week old mice by  
356 depleting CD44<sup>hi</sup> cells (Biolegend biotin anti-mouse/human CD44, clone IM7, 2μl per spleen). For *Il2ra*<sup>-/-</sup>  
357 single cell experiment, cells were further sorted for CD44<sup>lo</sup> with FACS. Purified naive P14 CD8<sup>+</sup> T cells  
358 were resuspended in serum free DMEM and transferred by retro-orbital injection. For scRNA-seq  
359 experiments during acute and chronic LCMV infection, 2x10<sup>4</sup> naive P14 CD8<sup>+</sup> T cells were transferred  
360 per recipient mouse. For *Il2ra*<sup>-/-</sup> single cell experiment, 2.4x10<sup>5</sup> naive P14 CD8<sup>+</sup> T cells were transferred  
361 per recipient mouse (Thy1.1<sup>+</sup> *Il2ra*<sup>-/-</sup> to Thy1.1<sup>+</sup> Thy1.2<sup>+</sup> ratio = 2:1). For retroviral transduction, purified  
362 naive CD8<sup>+</sup> T cells were activated with anti-CD3 and anti-CD28, retrovirus was packaged and cells were  
363 transduced as described<sup>25</sup> with the following modifications. Naive CD8 T cells were activated for 16-18  
364 hours, transduced for 4 hours with retroviral supernatants, and immediately transferred to naive 6-8 week  
365 old C57BL/6J hosts. 50,000 cells were transferred to each host and were infected with 2x10<sup>5</sup> PFU of  
366 LCMV<sub>Arm</sub>, or 500,000 cells were transferred and hosts were administered IP injection of 1.5x10<sup>5</sup> PFU of  
367 LCMV<sub>C113</sub>, or 1x10<sup>4</sup> CFU of LM<sub>GP33</sub>. LCMV<sub>Arm</sub>, LCMV<sub>C113</sub> and LM<sub>GP33</sub> stocks were produced as  
368 described<sup>25</sup>. Infections were administered ~1 hour after adoptive transfer of transduced T cells, or the  
369 following day(s) after naive cell transfer. Virus stocks were stored at -80°C and thawed immediately  
370 before dilution. IP injection of 2x10<sup>5</sup> PFU of LCMV<sub>Arm</sub> per mouse was used to initiate acute infection,  
371 and retroorbital injection of 2x10<sup>6</sup> PFU LCMV<sub>C113</sub> per mouse was used to initiate chronic infection.

372

### 373 **Flow cytometry analysis and Sorting for single cell sequencing**

374 Single cell suspensions were prepared by disrupting spleen sections by pressing through 70µm  
375 cell strainer in DMEM with 10% FBS. The splenocyte suspensions or heparinized peripheral blood  
376 collections were pelleted and red blood cells were lysed using ACK buffer. Cells were resuspended in  
377 FACS buffer, stained for surface proteins and then fixed in 2-4% PFA and permeabilized for intracellular  
378 staining. Anti-mouse CD4 (RM4-5), CD8 (53-6.7), CD44 (IM7), CD62L (MEL-14), CD25 (3C7), CD127  
379 (A7R34), KLRG1 (2F1/KLRG1), CD27 (LG.3A10), TCF-1 (S33-966), CX3CR1 (SA011F11) and were  
380 purchased from Biolegend or BD Biosciences. Intracellular staining for TCF-1 was performed using the  
381 Foxp3 transcription factor staining kit (eBioscience). For analysis of cells on days 3 or 4 of infection,  
382 spleens were cut into 1-2mm pieces and digested with collagenase IV (100 U/mL, Worthington) and  
383 DNase I (10 µg/mL, Sigma) in complete T cell media for 10 min at 37°C on a nutator, then disrupted over  
384 a 70µm cell strainer. For FACS isolation, CD8<sup>+</sup> T cells were initially enriched from total splenocyte  
385 preparations by negative selection with anti-CD4, anti-CD19, anti-B220 and anti-TER119 and magnetic  
386 streptavidin beads (Stemcell Technologies). Enriched cells were pre-stained with GP33-AF488 tetramer  
387 (NIH tetramer facility) to label endogenous LCMV-specific CD8<sup>+</sup> T cells, followed by staining with CD8  
388 (BV421), Thy1.1 (PE) and Thy1.2 (APC) to label donor P14 CD8<sup>+</sup> T cells and the cells were sorted using  
389 a BD FACS Aria™ Fusion.

390

### 391 ***In vivo* Pooled RNAi Screen**

392 The RNAi screen was performed and analyzed as shown in fig S4A-B and as previously  
393 described<sup>14</sup> with the following modifications and details. Naive P14 CD8 T cells were activated for 18  
394 hours using plate bound anti-CD3 and soluble anti-CD28 and transduced for 4 hours in 96 well plates  
395 before cells from all wells were pooled. Immediately after pooling (~24hrs post activation) aliquots of  
396 500,000 cells were transferred into multiple naive host mice that were rested for ~1 hour after receiving  
397 cells before inoculation with 1.5x10<sup>5</sup> PFU LCMV<sub>Cl13</sub> per mouse, which induces an acute infection in this  
398 setting<sup>14</sup>. Two entire biological replicates of the screen were performed and used for computational  
399 analysis, and each replicate was screened in three pools. Each pool of shRNAmirs targeting CRFs was  
400 generated from ~500 shRNAmirs shRNAmirs which also included a common set of control shRNAmirs.  
401 Each pool was analyzed in 10 recipient mice to maintain 50-100-fold theoretical representation of each  
402 shRNAmir after engraftment. For input samples, ~8x10<sup>5</sup> transduced cells were FACS-purified 48 hours  
403 after transduction. Eight days following infection, 3-8x10<sup>5</sup> cells from each KLRG1/CD127 gate were  
404 recovered by FACS from the spleens of infected mice. Genomic DNA was purified from each sample and  
405 used as PCR template to generate libraries for high-throughput sequencing as described<sup>14</sup>. Sequencing  
406 reads are mapped to library fasta file containing shRNA sequence information with custom blast pipeline.

407 Raw read counts for each shRNA are normalized to total counts, and quantiles of each shRNA were  
408 calculated with negative binomial distribution. To calculate the effect size of shRNA in different cell  
409 population, the difference between quantiles in different cell population (quantile shift) was calculated for  
410 individual shNRAs. To sum up the effect of each gene, the quantile shift for all shRNAs towards each  
411 gene were converted to Z-scores, which were averaged and adjusted by p-value (to account for the  
412 consistency of effect) to generate the adjusted Z-Scores for ranking (fig S4B).

413

#### 414 **Nascent RNA-seq analysis**

415 For nascent RNA-seq of *in vitro* activated CD8 T cells, chromatin-associated RNA was prepared  
416 and total RNA-seq libraries were prepared and sequenced as described <sup>25</sup>. Pair end fastq reads were  
417 trimmed with “trim\_galore --paired --length 24 --stringency 3”. Trimmed fastq reads were aligned to  
418 GRCm38 genome with bowtie2 with parameters “-p 16 -X 2000 --fr” <sup>57</sup>. Forward and reverse strand reads  
419 were separated with samtools <sup>58</sup>. Reads per transcript were counted with subread featureCounts <sup>59</sup>. Counts  
420 from forward and reverse strands were merged with custom python script. Differential analysis was  
421 performed with DEseq2 <sup>60</sup>.

422

#### 423 **Single cell RNA-seq library generation, sequencing and analysis**

424 To prepare barcoded scRNA-seq libraries from multiple libraries, anti-mouse mouse MHC H-2  
425 hashtag antibodies (Biolegend TotalSeq<sup>TM</sup>) were used to label separate FACS-purified subsets which  
426 were washed, counted and pooled to final concentration of ~1,600 cells/ul. A total of ~50,000 cells were  
427 loaded into one lane of the single cell A chip kit (P/N 1000009). Single-cell gel beads in emulsion (GEM)  
428 were generated using the 10X Chromium single cell controller (10X Genomics, Pleasanton, CA). Single-  
429 cell GEM's and sequencing libraries were generated using the Single-cell 3' library and gel bead kit V2  
430 (P/N 120267) according to manufacturer recommendations. The final library size distributions and  
431 amounts were assessed using bioanalyzer analysis and further quantified with the NEBNext library  
432 quantification kit (P/N E7630). The cDNA and HTO libraries were pooled 10:1 and sequenced to a depth  
433 of 50,000 reads per cell for the cDNA and 2,000 reads per cell for the HTO library. Libraries were  
434 sequenced on the Illumina NovaSeq with the following 10X read format; Read 1 25bp, index i7 8bp, and  
435 Read 2 98bp. Around 500 - 1500 million reads were generated per experiment, yielding 60-90%  
436 sequencing saturation and around 1500-3000 median genes per cell after alignment. For hashtag library  
437 sequences, 60-75% antibody reads were mapped to cells (usable), yielding around 3000-6000 usable  
438 antibody reads per cell.

439 Cellranger 3.0 was used for fastq generation (cellranger mkfastq) and counting (cellranger count).  
440 Standard quality filtering was performed with Scanpy to remove genes expressed in less than 3 cells,  
441 doublets or low read cells (with gene / count per cell cutoff), and cells with high mitochondria count  
442 percentage <sup>61</sup>. Demultiplexing of Biolegend hashtags was performed with a custom python script to  
443 exclude doublets and dropouts. After quality filtering, reads were normalized to 10,000 per cell and  
444 logarithmized. Highly variable genes were identified with scanpy.pp.highly\_variable\_genes and selected.  
445 Count matrices were then regressed and scaled with scanpy.pp.regress\_out and scanpy.pp.scale. Force-  
446 directed embedding was generated after PCA (scanpy.tl.pca) and UMAP based nearest neighbor analysis  
447 (scanpy.pp.neighbors). Louvain cluster extraction (scanpy.tl.louvain) was performed on force-directed  
448 embedding and the extracted clusters were analyzed with PAGA (scanpy.pl.paga) for cluster correlations  
449 <sup>18 13</sup>. For velocity-based analysis, Velocyto was used to generate spliced / unspliced count matrix <sup>12</sup>. The  
450 resulting matrix was processed in scVelo for velocity analysis <sup>11</sup>. For correlation of independent scRNA-  
451 seq experiments, Harmony was used for batch effect removal on normalized and scaled count matrices  
452 of experiments <sup>62</sup>. Dimensionality reduction was performed on batch effect removed matrices with PCA,  
453 followed by UMAP projection.

454

#### 455 **ChIP-seq analysis**

456 Raw fastq files of ChIP-seq experiments were downloaded from GEO with SRA-Tools fastq-  
457 dump. Trimming of fastq files were performed with trim\_galore. Trimpped reads were aligned to  
458 GRCm38 genome with bowtie2 <sup>57</sup>. Aligned sam file were sorted and filtered for PCR duplicates with  
459 samtools. Blacklisted regions were filtered with bedtools <sup>63,64</sup>. Peaks were called with MACS2 and  
460 annotated with R package ChIPSeeker <sup>65,66</sup>. All analytical codes for ChIP-seq are published on Github:  
461 [https://github.com/TCellResearchTeam/T\\_Cell\\_ChIP](https://github.com/TCellResearchTeam/T_Cell_ChIP). Visualization of ChIP data is accessible on [UCSC](#)  
462 [Track Hub](#): T\_cell\_ATAChIP\_Pipkin.

463

#### 464 **GSEA**

465 GSEA was performed with R package clusterProfiler <sup>20</sup>. GSEA signatures were downloaded or  
466 generated from published datasets available from GEO database. All signatures and description are  
467 available on [https://github.com/TCellResearchTeam/T\\_cell\\_signature\\_Reference](https://github.com/TCellResearchTeam/T_cell_signature_Reference).

## 468 References

- 469 1 Akondy, R. S. *et al.* Origin and differentiation of human memory CD8 T cells after vaccination. *Nature*  
470 **552**, 362-367, doi:10.1038/nature24633 (2017).
- 471 2 Jameson, S. C. & Masopust, D. Understanding Subset Diversity in T Cell Memory. *Immunity* **48**, 214-226,  
472 doi:10.1016/j.immuni.2018.02.010 (2018).
- 473 3 McLane, L. M., Abdel-Hakeem, M. S. & Wherry, E. J. CD8 T Cell Exhaustion During Chronic Viral  
474 Infection and Cancer. *Annu Rev Immunol* **37**, 457-495, doi:10.1146/annurev-immunol-041015-055318  
475 (2019).
- 476 4 Chung, H. K., McDonald, B. & Kaech, S. M. The architectural design of CD8+ T cell responses in acute  
477 and chronic infection: Parallel structures with divergent fates. *J Exp Med* **218**, doi:10.1084/jem.20201730  
478 (2021).
- 479 5 Restifo, N. P. & Gattinoni, L. Lineage relationship of effector and memory T cells. *Curr Opin Immunol* **25**,  
480 556-563, doi:10.1016/j.coi.2013.09.003 (2013).
- 481 6 Wherry, E. J. *et al.* Lineage relationship and protective immunity of memory CD8 T cell subsets. *Nature*  
482 *immunology* **4**, 225-234, doi:10.1038/ni889 (2003).
- 483 7 Kaech, S. M. & Wherry, E. J. Heterogeneity and cell-fate decisions in effector and memory CD8+ T cell  
484 differentiation during viral infection. *Immunity* **27**, 393-405, doi:S1074-7613(07)00410-4 [pii]  
485 10.1016/j.immuni.2007.08.007 (2007).
- 486 8 Buchholz, V. R., Schumacher, T. N. & Busch, D. H. T Cell Fate at the Single-Cell Level. *Annu Rev*  
487 *Immunol* **34**, 65-92, doi:10.1146/annurev-immunol-032414-112014 (2016).
- 488 9 Reiner, S. L. & Adams, W. C. Lymphocyte fate specification as a deterministic but highly plastic process.  
489 *Nat Rev Immunol* **14**, 699-704, doi:10.1038/nri3734 (2014).
- 490 10 Rosato, P. C., Wijeyesinghe, S., Stolley, J. M. & Masopust, D. Integrating resident memory into T cell  
491 differentiation models. *Curr Opin Immunol* **63**, 35-42, doi:10.1016/j.coi.2020.01.001 (2020).
- 492 11 Bergen, V., Lange, M., Peidli, S., Wolf, F. A. & Theis, F. J. Generalizing RNA velocity to transient cell  
493 states through dynamical modeling. *Nat Biotechnol* **38**, 1408-1414, doi:10.1038/s41587-020-0591-3  
494 (2020).
- 495 12 La Manno, G. *et al.* RNA velocity of single cells. *Nature* **560**, 494-498, doi:10.1038/s41586-018-0414-6  
496 (2018).
- 497 13 Wolf, F. A. *et al.* PAGA: graph abstraction reconciles clustering with trajectory inference through a  
498 topology preserving map of single cells. *Genome Biol* **20**, 59, doi:10.1186/s13059-019-1663-x (2019).
- 499 14 Chen, R. *et al.* *In vivo* RNA interference screens identify regulators of antiviral CD4(+) and CD8(+) T cell  
500 differentiation. *Immunity* **41**, 325-338, doi:10.1016/j.immuni.2014.08.002 (2014).
- 501 15 Wherry, E. J., Blattman, J. N., Murali-Krishna, K., van der Most, R. & Ahmed, R. Viral persistence alters  
502 CD8 T-cell immunodominance and tissue distribution and results in distinct stages of functional  
503 impairment. *J Virol* **77**, 4911-4927 (2003).
- 504 16 D'Souza, W. N. & Hedrick, S. M. Cutting edge: latecomer CD8 T cells are imprinted with a unique  
505 differentiation program. *J Immunol* **177**, 777-781, doi:10.4049/jimmunol.177.2.777 (2006).
- 506 17 Blondel, V. D., Guillaume, J. L., Lambiotte, R. & Lefebvre, E. Fast unfolding of communities in large  
507 networks. *J Stat Mech-Theory E*, doi:Artn P10008  
508 10.1088/1742-5468/2008/10/P10008 (2008).
- 509 18 Becht, E. *et al.* Dimensionality reduction for visualizing single-cell data using UMAP. *Nat Biotechnol* **37**,  
510 38-44 (2019).
- 511 19 Subramanian, A. *et al.* Gene set enrichment analysis: a knowledge-based approach for interpreting genome-  
512 wide expression profiles. *Proc Natl Acad Sci U S A* **102**, 15545-15550, doi:10.1073/pnas.0506580102  
513 (2005).
- 514 20 Yu, G., Wang, L. G., Han, Y. & He, Q. Y. clusterProfiler: an R package for comparing biological themes  
515 among gene clusters. *OMICS* **16**, 284-287, doi:10.1089/omi.2011.0118 (2012).
- 516 21 Best, J. A. *et al.* Transcriptional insights into the CD8(+) T cell response to infection and memory T cell  
517 formation. *Nature immunology* **14**, 404-412, doi:10.1038/ni.2536 (2013).
- 518 22 Stauber, D. J., Debler, E. W., Horton, P. A., Smith, K. A. & Wilson, I. A. Crystal structure of the IL-2  
519 signaling complex: paradigm for a heterotrimeric cytokine receptor. *Proc Natl Acad Sci U S A* **103**, 2788-  
520 2793, doi:10.1073/pnas.0511161103 (2006).
- 521 23 Wang, X., Rickert, M. & Garcia, K. C. Structure of the quaternary complex of interleukin-2 with its alpha,  
522 beta, and gammac receptors. *Science* **310**, 1159-1163, doi:10.1126/science.1117893 (2005).



- 523 24 Diao, H. & Pipkin, M. Stability and flexibility in chromatin structure and transcription underlies memory  
524 CD8 T-cell differentiation. *FI000Res* **8**, doi:10.12688/fi000research.18211.1 (2019).
- 525 25 Wang, D. *et al.* The Transcription Factor Runx3 Establishes Chromatin Accessibility of cis-Regulatory  
526 Landscapes that Drive Memory Cytotoxic T Lymphocyte Formation. *Immunity* **48**, 659-674 e656,  
527 doi:10.1016/j.immuni.2018.03.028 (2018).
- 528 26 Kaech, S. M. & Cui, W. Transcriptional control of effector and memory CD8+ T cell differentiation.  
529 *Nature reviews. Immunology* **12**, 749-761, doi:10.1038/nri3307 (2012).
- 530 27 Milner, J. J. & Goldrath, A. W. Transcriptional programming of tissue-resident memory CD8(+) T cells.  
531 *Curr Opin Immunol* **51**, 162-169, doi:10.1016/j.coi.2018.03.017 (2018).
- 532 28 Shu, J. *et al.* Induction of Pluripotency in Mouse Somatic Cells with Lineage Specifiers. *Cell* **153**, 963-975,  
533 doi:10.1016/j.cell.2013.05.001 (2013).
- 534 29 Laslo, P. *et al.* Multilineage transcriptional priming and determination of alternate hematopoietic cell fates.  
535 *Cell* **126**, 755-766, doi:10.1016/j.cell.2006.06.052 (2006).
- 536 30 Joshi, N. S. *et al.* Inflammation directs memory precursor and short-lived effector CD8(+) T cell fates via  
537 the graded expression of T-bet transcription factor. *Immunity* **27**, 281-295,  
538 doi:10.1016/j.immuni.2007.07.010 (2007).
- 539 31 Dominguez, C. X. *et al.* The transcription factors ZEB2 and T-bet cooperate to program cytotoxic T cell  
540 terminal differentiation in response to LCMV viral infection. *J Exp Med* **212**, 2041-2056,  
541 doi:10.1084/jem.20150186 (2015).
- 542 32 Omilusik, K. D. *et al.* Transcriptional repressor ZEB2 promotes terminal differentiation of CD8+ effector  
543 and memory T cell populations during infection. *J Exp Med* **212**, 2027-2039, doi:10.1084/jem.20150194  
544 (2015).
- 545 33 Beltra, J. C. *et al.* Developmental Relationships of Four Exhausted CD8(+) T Cell Subsets Reveals  
546 Underlying Transcriptional and Epigenetic Landscape Control Mechanisms. *Immunity* **52**, 825-841 e828,  
547 doi:10.1016/j.immuni.2020.04.014 (2020).
- 548 34 Milner, J. J. *et al.* Runx3 programs CD8(+) T cell residency in non-lymphoid tissues and tumours. *Nature*  
549 **552**, 253-257, doi:10.1038/nature24993 (2017).
- 550 35 Alfei, F. *et al.* TOX reinforces the phenotype and longevity of exhausted T cells in chronic viral infection.  
551 *Nature* **571**, 265-269, doi:10.1038/s41586-019-1326-9 (2019).
- 552 36 Khan, O. *et al.* TOX transcriptionally and epigenetically programs CD8(+) T cell exhaustion. *Nature* **571**,  
553 211-218, doi:10.1038/s41586-019-1325-x (2019).
- 554 37 Yao, C. *et al.* Single-cell RNA-seq reveals TOX as a key regulator of CD8(+) T cell persistence in chronic  
555 infection. *Nat Immunol* **20**, 890-901, doi:10.1038/s41590-019-0403-4 (2019).
- 556 38 Pipkin, M. E. Runx proteins and transcriptional mechanisms that govern memory CD8 T cell development.  
557 *Immunol Rev* **300**, 100-124, doi:10.1111/imr.12954 (2021).
- 558 39 Wu, J. I., Lessard, J. & Crabtree, G. R. Understanding the words of chromatin regulation. *Cell* **136**, 200-  
559 206, doi:10.1016/j.cell.2009.01.009 (2009).
- 560 40 Bajpai, R. *et al.* CHD7 cooperates with PBAF to control multipotent neural crest formation. *Nature* **463**,  
561 958-962, doi:10.1038/nature08733 (2010).
- 562 41 Gennery, A. R. *et al.* Mutations in CHD7 in patients with CHARGE syndrome cause T-B + natural killer  
563 cell + severe combined immune deficiency and may cause Omenn-like syndrome. *Clin Exp Immunol* **153**,  
564 75-80, doi:10.1111/j.1365-2249.2008.03681.x (2008).
- 565 42 Hurd, E. A., Poucher, H. K., Cheng, K., Raphael, Y. & Martin, D. M. The ATP-dependent chromatin  
566 remodeling enzyme CHD7 regulates pro-neural gene expression and neurogenesis in the inner ear.  
567 *Development* **137**, 3139-3150, doi:10.1242/dev.047894 (2010).
- 568 43 Writzl, K., Cale, C. M., Pierce, C. M., Wilson, L. C. & Hennekam, R. C. Immunological abnormalities in  
569 CHARGE syndrome. *Eur J Med Genet* **50**, 338-345, doi:10.1016/j.ejmg.2007.05.002 (2007).
- 570 44 Chi, T. H. *et al.* Reciprocal regulation of CD4/CD8 expression by SWI/SNF-like BAF complexes. *Nature*  
571 **418**, 195-199, doi:10.1038/nature00876 (2002).
- 572 45 Mackay, L. K. *et al.* Hobit and Blimp1 instruct a universal transcriptional program of tissue residency in  
573 lymphocytes. *Science* **352**, 459-463, doi:10.1126/science.aad2035 (2016).
- 574 46 Xin, A. *et al.* A molecular threshold for effector CD8(+) T cell differentiation controlled by transcription  
575 factors Blimp-1 and T-bet. *Nat Immunol* **17**, 422-432, doi:10.1038/ni.3410 (2016).
- 576 47 Wu, T. *et al.* The TCF1-Bcl6 axis counteracts type I interferon to repress exhaustion and maintain T cell  
577 stemness. *Science immunology* **1** (2016).

578 48 Keppler, S. J., Rosenits, K., Koegl, T., Vucikuja, S. & Aichele, P. Signal 3 cytokines as modulators of  
579 primary immune responses during infections: the interplay of type I IFN and IL-12 in CD8 T cell  
580 responses. *PLoS One* **7**, e40865, doi:10.1371/journal.pone.0040865 (2012).

581 49 Kurd, N. S. *et al.* Early precursors and molecular determinants of tissue-resident memory CD8(+) T  
582 lymphocytes revealed by single-cell RNA sequencing. *Sci Immunol* **5**, doi:10.1126/sciimmunol.aaz6894  
583 (2020).

584 50 Milner, J. J. *et al.* Heterogenous Populations of Tissue-Resident CD8(+) T Cells Are Generated in  
585 Response to Infection and Malignancy. *Immunity* **52**, 808-824 e807, doi:10.1016/j.immuni.2020.04.007  
586 (2020).

587 51 Fonseca, R. *et al.* Developmental plasticity allows outside-in immune responses by resident memory T  
588 cells. *Nat Immunol* **21**, 412-421, doi:10.1038/s41590-020-0607-7 (2020).

589 52 Youngblood, B. *et al.* Effector CD8 T cells dedifferentiate into long-lived memory cells. *Nature* **552**, 404-  
590 409, doi:10.1038/nature25144 (2017).

591 53 Pauken, K. E. *et al.* Epigenetic stability of exhausted T cells limits durability of reinvigoration by PD-1  
592 blockade. *Science* **354**, 1160-1165, doi:10.1126/science.aaf2807 (2016).

593 54 Sen, D. R. *et al.* The epigenetic landscape of T cell exhaustion. *Science* **354**, 1165-1169,  
594 doi:10.1126/science.aae0491 (2016).

595 55 Li, P. *et al.* STAT5-mediated chromatin interactions in superenhancers activate IL-2 highly inducible  
596 genes: Functional dissection of the *Il2ra* gene locus. *Proceedings of the National Academy of Sciences* **114**,  
597 12111-12119 (2017).

598 56 Rodda, L. B. *et al.* Single-Cell RNA Sequencing of Lymph Node Stromal Cells Reveals Niche-Associated  
599 Heterogeneity. *Immunity* **48**, 1014-+, doi:10.1016/j.immuni.2018.04.006 (2018).

600 57 Langmead, B. & Salzberg, S. L. Fast gapped-read alignment with Bowtie 2. *Nat Methods* **9**, 357-359  
601 (2012).

602 58 Li, H. *et al.* The sequence alignment/map format and SAMtools. *Bioinformatics* **25**, 2078-2079 (2009).

603 59 Liao, Y., Smyth, G. K. & Shi, W. The Subread aligner: fast, accurate and scalable read mapping by seed-  
604 and-vote. *Nucleic acids research* **41**, e108-e108 (2013).

605 60 Love, M. I., Huber, W. & Anders, S. Moderated estimation of fold change and dispersion for RNA-seq data  
606 with DESeq2. *Genome Biol* **15**, 550, doi:10.1186/s13059-014-0550-8 (2014).

607 61 Wolf, F. A., Angerer, P. & Theis, F. J. SCANPY: large-scale single-cell gene expression data analysis.  
608 *Genome Biol* **19**, 15, doi:10.1186/s13059-017-1382-0 (2018).

609 62 Korsunsky, I. *et al.* Fast, sensitive and accurate integration of single-cell data with Harmony. *Nat Methods*  
610 **16**, 1289-1296 (2019).

611 63 Amemiya, H. M., Kundaje, A. & Boyle, A. P. The ENCODE blacklist: identification of problematic  
612 regions of the genome. *Scientific reports* **9**, 1-5 (2019).

613 64 Quinlan, A. R. & Hall, I. M. BEDTools: a flexible suite of utilities for comparing genomic features.  
614 *Bioinformatics* **26**, 841-842 (2010).

615 65 Zhang, Y. *et al.* Model-based analysis of ChIP-Seq (MACS). *Genome Biol* **9**, R137, doi:10.1186/gb-2008-  
616 9-9-r137 (2008).

617 66 Yu, G., Wang, L. G. & He, Q. Y. ChIPseeker: an R/Bioconductor package for ChIP peak annotation,  
618 comparison and visualization. *Bioinformatics* **31**, 2382-2383, doi:10.1093/bioinformatics/btv145 (2015).

619  
620

621 **Acknowledgments:** This work was supported by Scripps Florida via the State of Florida (M.S.S.),  
622 U19AI109976 (S.C., A.W.G., and M.E.P.), P01AI145815 (S.C., A.W.G., and M.E.P.), and the  
623 Frenchman's Creek Women for Cancer Research (M.E.P.). We thank the The NIH Tetramer Facility  
624 which is supported by contract 75N93020D00005. We would like to thank Drs. Mark Sundrud, Kendall  
625 Nettles, and John Chang for critically reading the manuscript.

626  
627 **Author contributions:** H.D., M.E.P. and S.C. conceived the study. H.D. and M.E.P. wrote the  
628 manuscript with help from A.W.G, S.C., J.J.M., and G.M.. H.D. performed bioinformatics analysis and  
629 conducted experiments. R.C. conducted RNAi screen. T.C.V. performed initial analysis of RNAi screen.  
630 R.C., D.W., S.T., M.A.F., J.K., P.K., A.J.G, C.T. and J.J.M. performed experiments and analysis. D.M.M.  
631 provided insights and reagents related to Chd7.

632  
633 **Declaration of interests:** The authors declare no competing interests.  
634

635 **Figure 1. Naive CD8 T cells differentiate along a linear path into common effector and memory**  
636 **progenitor (EMP) cells.**

637 (A) PAGA initialized force-directed (FA) embedding based on individual cell gene expression profile,  
638 each dot represent one cell. PAGA connectivity analysis was performed on indicated clusters P0-P10.  
639 Clusters were extracted by Louvain method based on neighborhood graph. Neighborhood graph was  
640 calculated with UMAP algorithm.

641 (B) Top: PAGA connectivity graph, each node represent one cluster, node sizes represent relative cell  
642 number of cluster, edge widths represent relative PAGA connectivity score. Bottom: heatmap of PAGA  
643 connectivity score between clusters.

644 (C) PAGA initialized FA embedding, coloring cells based on origin: day5 /day8, naive (grey) / LCMV<sub>Arm</sub>  
645 (purple) / LCMV<sub>Cl13</sub> (orange).

646 (D) GSEA of selected signatures for Louvain clusters, separating LCMV<sub>Arm</sub> / LCMV<sub>Cl13</sub>. GSEA analysis  
647 performed on mean of normalized gene expression per cluster. NES represented by color,  $-\log_{10}(\text{padj})$   
648 represented by dot size. Labels of clusters inferred by GSEA result. (See also fig S1 J-M)

649 (E) Mean of scaled expression, showing top signature genes of Louvain clusters. Signature genes were  
650 selected based on multiple differential analysis (Wilcoxon rank sum test, t-test, t-test over estimated  
651 variances) of cells within each cluster v.s. all others, with adjusted p-adj cutoff 0.05 (intersection of all  
652 tests) and absolute log2 fold change cutoff 1. Chromatin remodeling factors, transcription factors and  
653 surface proteins were selected from the genes that meet the statistical cutoffs for creating the signature  
654 gene lists. (See also Table S1). Top 10 signature genes ranked by t-test scores are represented in heatmap.

655 (F) Expression of cell surface markers by CTV determined by flow cytometry. 50,000 P14 CD8 T cells  
656 were transferred per recipient mice which were given LCMV<sub>Arm</sub>. Naive cells (grey) and cells from day3  
657 (blue) / day4 (purple) post infection are represented in plots.

658 (G) Raw expression (logrithmized and normalized) of selected genes.

659

660 **Figure 2. Disparate RNA velocities develop in individual EMP cells and initiate a branched**  
661 **manifold that establishes T<sub>MEM</sub> and T<sub>EX</sub> cell diversity.**

662 (A) Stream plot of velocity embedded on PAGA initialized single cell projection, separating LCMV<sub>Arm</sub> /  
663 LCMV<sub>Cl13</sub> (including naive cells in both conditions).

664 (B) Transition probability heatmap between clusters estimated by scVelo, separating LCMV<sub>Arm</sub> /  
665 LCMV<sub>Cl13</sub>. Color represent transition probability from row cluster to column cluster.

666 (C) Inferred LCMV<sub>Arm</sub> / LCMV<sub>Cl13</sub> developmental trajectory by PAGA connectivity analysis, scVelo  
667 transition probability, pseudo-time (see Table S1) and real time.

668 (D) Spliced transcript abundance (Ms) of representative genes for each of the four inferred trajectory in  
669 LCMV<sub>Arm</sub> / LCMV<sub>C113</sub>.  
670 (E) Single cell velocity of selected driver genes, separating LCMV<sub>Arm</sub> / LCMV<sub>C113</sub>. Potential driver genes  
671 were identified by combining top likelihood genes from analysis of all cells or multiple pairs of clusters  
672 with transitioning potential. Transcription factors, chromatin remodelers and surface receptors were  
673 selected within the identified likelihood genes (See Table S3).

674

675 **Figure 3: IL-2R-dependent transcription establishes EMP cells and transcriptional heterogeneity.**

676 (A) Heatmap of spliced transcript abundance of EMP<sup>P2</sup> signature driver genes. EMP<sup>P2</sup> common driver  
677 genes were defined as intersection between driver genes with likelihood > 0.25 in: all cells, P2-P4, P2-P5  
678 and P2-P7 (Table S3) P2 signature driver genes were defined as intersection between P2 signature genes  
679 (described in **Fig 1E** and Table S1) and EMP<sup>P2</sup> common driver genes.

680 (B) Single cell normalized *Il2ra* transcript abundance, spliced (Ms) / unspliced (Mu).

681 (C) PAGA initialized FA embedding based on single cell cell gene expression profile for Exp-*Il2ra*.

682 PAGA connectivity analysis was performed on indicated clusters. Clusters were extracted from UMAP  
683 neighbor graph by Louvain method.

684 (D) Correlation of clusters between acute v.s. chronic single cell experiment and Exp-*Il2ra*. Correlation  
685 represented by mean UMAP nearest neighbor graph scores between clusters from two experiments.

686 UMAP projection of single cells from two experiments generated by Harmony integrated normalized  
687 count matrix from both experiment.

688 (E) Transition probability between clusters in activated WT and *Il2ra*<sup>-/-</sup> cells. Left: all single cells from  
689 WT / *Il2ra*<sup>-/-</sup> samples in PAGA projection. Right: transition probability heatmap.

690 (F) Percentage distribution in Louvain clusters for each cell type. Total percentage in all Louvain clusters  
691 add up to 100% for each cell type.

692 (G) Signature gene heatmap for clusters (calculated for all cells, including naive, WT and *Il2ra*<sup>-/-</sup>).  
693 Method as described in **Fig 1E**.

694 (H) Heatmap of log<sub>2</sub> fold change of WT versus *Il2ra*<sup>-/-</sup> for selected differential genes. Genes were  
695 selected from cluster signature gene list (described in **Fig 2G**). The genes with minimum expression of  
696 0.0015 in at least one cluster and with absolute log<sub>2</sub>fc >= 2 in at least one cluster (WT versus *Il2ra*<sup>-/-</sup>)  
697 were used.

698 (I) Differential analysis of transcript abundance comparing Exp-*Il2ra*<sup>P1</sup> and Exp-*Il2ra*<sup>P2</sup>. X-axis represents  
699 log<sub>2</sub> fold change, and the y-axis represents -log<sub>10</sub>(pvalue). The horizontal line indicates pval = 0.05. The  
700 vertical lines indicates absolute log<sub>2</sub>fc = 1. T<sub>RM</sub> and T<sub>SCM</sub> signature genes are highlighted in yellow and  
701 green respectively.

702 (J) Number of differential nascent transcripts (between WT and *Il2ra*<sup>-/-</sup>) at different time points post  
703 activation. Differential nascent transcript is determined by DESeq2 (padj < 0.05) .  
704 (K) Differential analysis volcano plot of WT versus *Il2ra*<sup>-/-</sup> at 48 hours post activation. The x-axis  
705 represents log<sub>2</sub> fold change, and y-axis represents -log<sub>10</sub>(pvalue). The horizontal line indicates pval =  
706 0.05. The vertical lines indicates absolute log<sub>2</sub>fc = 1. T<sub>RM</sub> and T<sub>SCM</sub> signature genes are highlighted in  
707 yellow and green respectively.

708

709 **Figure 4: Differential utilization of CRFs establishes antiviral CD8 T cell heterogeneity.**

710 (A) Pooled RNAi screen and analysis simplified schematic (detailed schematic in fig S4A-B).

711 (B-D) Ranked lists of adjusted RNA - effects for input versus output, MP versus TE, and EE versus  
712 others. Red / blue highlight genes that are top / bottom quarter in effect ranking.

713 (E-F) Experiment characterizing endogeneous CD8<sup>+</sup> T cells response to LCMV<sub>Arm</sub> infection (day 8 pi), in  
714 mice of *Chd7*<sup>fl/fl</sup>, *Chd7*<sup>+/fl</sup>, *Chd7*<sup>+/+</sup> genotypes. (E) Total activated CD8 T cell number in spleens. (F)  
715 Representative flow cytometry plots showing CD127 and KLRG1 staining, and summarized percentages  
716 of cells in each category.

717 (G) *Smarca4* and *Chd7* velocity and spliced transcript abundance (Ms) in single cell projection, separating  
718 LCMV<sub>Arm</sub> / LCMV<sub>C113</sub>.

719 (H) GSEA of *shChd7* versus *shCd4* (control) and *shBrg1* versus *shCd19* (control). Signatures: IL-2  
720 regulated signatures / key CD8 transcription factor (TF) regulated signatures / CD8 phenotype signatures /  
721 Best et. al. longitudinal expression dynamic gene signatures.

722 (I) Differential expression of selected genes. Heatmap showing log<sub>2</sub> fold change of gene expression  
723 comparing *shChd7* versus *shCd4* (control) or *shBrg1* versus *shCd19* (control).

724 (J-K) Comparison of T-bet expression and phenotype between *shChd7* versus *shCd4* (control) during  
725 LCMV<sub>Arm</sub> or *Listeria* infection. Top: representative and summarized T-bet MFI. Bottom: representative  
726 flow cytometry plot showing CD127 and KLRG1 staining.

727 (L) Multidimensional scaling plot showing similarity / dis-similarity of *Chd7*<sup>fl/fl</sup> versus *Chd7*<sup>+/+</sup> cells in  
728 different stages: naive / 48h post activation / day8 sorted subsets.

729 (M) Differential expression of selected genes. Heatmap showing log<sub>2</sub> fold change of gene expression  
730 between *Chd7*<sup>fl/fl</sup> versus *Chd7*<sup>+/+</sup> in day8 sorted subsets (TE, MP, EE).

731

732

733 **Figure S1. Unsupervised approach to define early developmental clusters of antiviral CD8 T cells**  
734 **during acute and chronic viral infections at single cell level.**

735 (A) Schematic of acute v.s. chronic single cell experiment. Donor naive P14 Thy1.1 CD8<sup>+</sup> T cells from  
736 were isolated and transferred into 4 groups of WT recipient mice at day -1. LCMV<sub>Arm</sub> and LCMV<sub>Cl13</sub>  
737 infections were given at either day 0 or day 3 for each group. P14 Thy1.1 donor CD8<sup>+</sup> T cells and GP33  
738 Tetramer<sup>+</sup> endogenous LCMV responding CD8<sup>+</sup> cells (Tet) were isolated at the same day for each group.  
739 Cells of each different origin were hash-tagged and mixed for scRNAseq in the same batch.

740 (B) Schematic of bioinformatic analysis pipeline of acute v.s. chronic single cell experiment. 10x outputs  
741 were converted to fastq files and counted for transcript abundance with Cellranger 3.0. Basic quality filter  
742 and normalization was performed with Scanpy. Biolegend hashtags were demultiplexed with custom  
743 python script. Outliers were detected with DBSCAN (scikit-learn). Cells from each condition were  
744 resampled to 750 – 1250 cells condition. Dimensionality reduction (PCA, UMAP, Force Atlas), clustering  
745 (Louvain) and cluster connectivity analysis (PAGA) were performed with Scanpy functions. The count  
746 matrix was also processed with Velocyto to separate spliced and unspliced transcripts for further velocity  
747 associated analysis with scVelo.

748 (C) Stacked bar chart showing composition by different cell type for each Louvain cluster P0-P10. For  
749 each cluster, total percentages of all cell types add up to 100%.

750 (D) Heatmap showing percentage distribution in Louvain clusters for each cell type. For each cell type,  
751 total percentage in all Louvain clusters add up to 100%.

752 (E) Heatmap represents similarity between cell types based on distribution in Louvain clusters estimated  
753 by bhattacharyya coefficient.

754 (F) Chi-square analysis of distribution of day 5 LCMV<sub>Arm</sub> / LCMV<sub>Cl13</sub> P14 CD8<sup>+</sup> cell distribution in / out  
755 cluster P2.

756 (G) Violin plots of raw expression (logrithmized and normalized) per cluster for selected phenotype  
757 marker genes.

758 (H) See **Fig 1E** description: mean of scaled expression heatmap, top 10 genes ranked by t-test score  
759 plotted. Left: all cells; middle and right: separating LCMV<sub>Arm</sub> / LCMV<sub>Cl13</sub>.

760 (I) Phenotype correlation between CX3CR1 - CD27 and CD25 - TCF-1 of transferred P14 CD8<sup>+</sup> cell day  
761 4 post LCMV infection (50k cells transferred).

762 (J) (K) (L) (M) GSEA of selected signatures for Louvain clusters, separating LCMV<sub>Arm</sub> / LCMV<sub>Cl13</sub>.  
763 GSEA analysis performed on mean of normalized gene expression per cluster. Colors of dots represent  
764 NES, and sizes of dots represent -log<sub>10</sub>(padj) of signature enrichment. Best et. el. signatures annotated  
765 with longitudinal expression dynamics of genes in the clusters and grouped based on expression dynamics  
766 (plot from original publication).

767

768 **Figure S2. Single cell RNA velocity and root / terminal score indicates P2 & P5 are developmental**  
769 **roots.**

770 (A) Single cell velocity vectors for each cluster.

771 (B)(C) Root / terminal score analysis, separating LCMV<sub>Arm</sub> / LCMV<sub>Cl13</sub> (not including naive cells). Top:  
772 Root / terminal score of single cells, overlaid with grid velocity. Bottom: average root / terminal per  
773 cluster.

774 (D)(E) Single cell spliced transcript abundance / unspliced transcript abundance for selected driver genes,  
775 Separating LCMV<sub>Arm</sub> / LCMV<sub>Cl13</sub>.

776 (F) GSEA analysis of P14 Runx3<sup>-/-</sup> versus WT CD8 T cell gene expression, at day 5 / day 8 p.i. LCMV  
777 infection. Positive NES scores indicate signature genes more highly expressed in Runx3<sup>-/-</sup> comparing with  
778 WT; negative NES scores indicate signature genes more highly expressed in WT comparing with Runx3<sup>-/-</sup>.  
779 <sup>-/-</sup>.

780 **Figure S3. IL-2 signaling contribute to EMP formation via transcription regulation**

781 (A) Schematic of Exp-*Il2ra*: *Il2ra*<sup>-/-</sup> and WT P14 CD8<sup>+</sup> T cell cogenetic transfer and single cell  
782 experiment.

783 (B) Left: PAGA connectivity graph, each node represent one cluster, node sizes represent relative cell  
784 number of cluster, edge widths represent relative PAGA connectivity score. Middle: heatmap of PAGA  
785 connectivity score between clusters. Right: Stacked bar chart showing composition by different cell type  
786 for each Louvain clusters. For each cluster, total percentages of all cell types add up to 100%.

787 (C) Exp-*Il2ra* PAGA initialized FA embedding, highlighting cells of different origin.

788 (D) Terminal score of *Il2ra*<sup>-/-</sup> single cells in Exp-*Il2ra*.

789 (E) Chi-square analysis of cell type distribution in Exp-*Il2ra*. Top: Cell number distribution in activated  
790 clusters in Exp-*Il2ra*<sup>P1</sup> or outside of Exp-*Il2ra*<sup>P1</sup> for WT and *Il2ra*<sup>-/-</sup>. Bottom: Cell number distribution in  
791 activated clusters except for P1, comparing WT and *Il2ra*<sup>-/-</sup>.

792 (F) GSEA of T<sub>RM</sub> gene signature in Exp-*Il2ra*<sup>P5</sup> WT versus *Il2ra*<sup>-/-</sup>.

793 (G) Differential expression volcano plot of WT and *Il2ra*<sup>-/-</sup> in Exp-*Il2ra*<sup>P2</sup>. The x-axis represents log<sub>2</sub> fold  
794 change, and y-axis represents -log<sub>10</sub>(pvalue). The horizontal line indicates pval = 0.05. The vertical lines  
795 indicates absolute log<sub>2</sub>fc = 1. TE signature genes marked in green.

796 (H) Schematic of *Il2ra*<sup>-/-</sup> and WT P14 CD8<sup>+</sup> T cell *in vitro* activation and nascent RNA-seq experiment.

797 (I) See **Fig 3H**. Dark red and dark blue area represent number of genes that are expressed higher in  
798 WT than *Il2ra*<sup>-/-</sup> which are upregulated post activation (each time point versus naive), or genes expressed  
799 lower in WT than *Il2ra*<sup>-/-</sup> which are downregulated post activation.



- 800 (J) GSEA of T<sub>SCM</sub> signature indicates that *Il2ra*<sup>-/-</sup> express T<sub>SCM</sub> signature genes at higher level than WT at  
801 48h post activation.
- 802 (K) GSEA enrichment of IL-2 promoted / repressed genes in Exp-*Il2ra*<sup>P3</sup>(EMP) versus Exp-*Il2ra*<sup>P1</sup>  
803 (Arrested) differential gene list (signature genes selected from DEseq2 analysis of 48h post activation,  
804 WT versus *Il2ra*<sup>-/-</sup> with cutoffs padj < 0.05, absolute log2 fold change > 1.2).
- 805 (L) Venn diagrams showing overlap between P2 LCMV<sub>Arm</sub> and LCMV<sub>C113</sub> differential genes (padj < 0.05)  
806 and IL2-Stat5 promoted / repressed genes. Pie charts showing the percentage of Stat3 bound genes in the  
807 intersection of LCMV<sub>Arm</sub> and LCMV<sub>C113</sub> differential genes and IL2-Stat5 promoted / repressed genes.  
808 IL2-Stat5 promoted genes: nascent transcript abundance WT > *Il2ra*<sup>-/-</sup> and WT 48h > WT 6h (DESeq2,  
809 pvalue <= 0.05), intersected with genes that are bound by Stat5<sup>1</sup>. IL2-Stat5 repressed genes: nascent  
810 transcript abundance WT < *Il2ra*<sup>-/-</sup> and WT 48h < WT 6h (DESeq2, pvalue <= 0.05), intersected with  
811 genes that are bound by Stat5.
- 812 (M) GSEA enrichment of IL2 repressed signature between LCMV<sub>Arm</sub> and LCMV<sub>C113</sub> differential velocity  
813 genes in EMP<sup>P2</sup>.
- 814 (N) GSEA enrichment of 48h IL2 repressed signature (described in fig S3K) in pT<sub>SCM</sub><sup>P7</sup> versus EMP<sup>P2</sup>,  
815 separating LCMV<sub>Arm</sub> and LCMV<sub>C113</sub>.
- 816 (O) Visualization of ChIP-seq, ATAC-seq and nascent RNA-seq tracks at *Il6st* and *Bcl6* regions.  
817 Asterisks represent significant peaks (MACS2, q-value < 0.01).

818

819 **Figure S4. Identification and functional analysis of CRFs that is required for CD8<sup>+</sup> T cell lineage**  
820 **formation**

- 821 (A) Experimental setup of CRF RNAi screen (See **Methods**).
- 822 (B) Bioinformatic analysis pipeline of CRF RNAi screen (See **Methods**).
- 823 (C) Flow cytometry at day5 pi showing KLRG1<sup>hi</sup> population in *Chd7*<sup>fl/fl</sup> is reduced comparing with  
824 *Chd7*<sup>+/+</sup>.
- 825 (D)(E) Flow cytometry of transduced and transferred P14 CD8 T cells post LCMV<sub>Arm</sub> infection. CD8 T  
826 cells were simultaneously transduced with a combination of retroviral vectors containing sh*Cd4*  
827 (Ametrine, control) and empty vector (GFP, control), or a combination of retroviral vectors containing  
828 sh*Smarca4* / sh*Chd7* (Ametrine) and T-bet cDNA (GFP). Phenotypes of RNAi and T-bet overexpression  
829 were accessed by flow cytometry at day8 pi.
- 830 (F)(G)(H) Ranked lists of adjusted RNA - effects for input versus output, MP versus TE, and EE versus  
831 others (as described in fig 5B-D), annotating genes from major CRF families.
- 832 (I) Six major clusters of CRFs extracted from hierarchical clustering of CRFs based on RNAi effect  
833 scores of 3 categories (MP v.s. TE, EE v.s. Other, Input v.s. Output) from screen.

834 (J)(K) Flow cytometry of splenic CD8<sup>+</sup> T cell phenotype day8 pi LCMV<sub>Arm</sub>, comparing transferred P14  
835 CD8<sup>+</sup> T cells transduced with sh*Cd4*(control) and multiple shRNAs against *Carm1* and *Prmt5*.

836 (L) Flow cytometry of peripheral blood CD8<sup>+</sup> T cell phenotype day7 and day12 pi LCMV<sub>Arm</sub>, comparing  
837 congenially transferred P14 CD8<sup>+</sup> T cells transduced with sh*Cd19*(control) and sh*Taf1*.

838

839 **Table S1.**

840 Acute versus Chronic infection (LCMV<sub>Arm</sub> / LCMV<sub>CI13</sub>) single cell experiment - clusters and cluster  
841 signature genes

842

843 **Table S2.**

844 GSEA signatures

845

846 **Table S3.**

847 Acute versus Chronic infection (LCMV<sub>Arm</sub> / LCMV<sub>CI13</sub>) single cell experiment - differential expression  
848 of genes between LCMV<sub>Arm</sub> and LCMV<sub>CI13</sub>

849

850 **Table S4.**

851 Acute versus Chronic infection (LCMV<sub>Arm</sub> / LCMV<sub>CI13</sub>) single cell experiment - scVelo likelihood genes

852

853 **Table S5.**

854 Acute versus Chronic infection (LCMV<sub>Arm</sub> / LCMV<sub>CI13</sub>) single cell experiment - spliced / unspliced  
855 transcript abundance and velocity of likelihood genes

856

857 **Table S6.**

858 Exp-*Il2ra* - clusters and cluster signature genes

859

860 **Table S7.**

861 RNAi screen of chromatin remodelers: shRNA sequences; scores of each gene in different comparisons

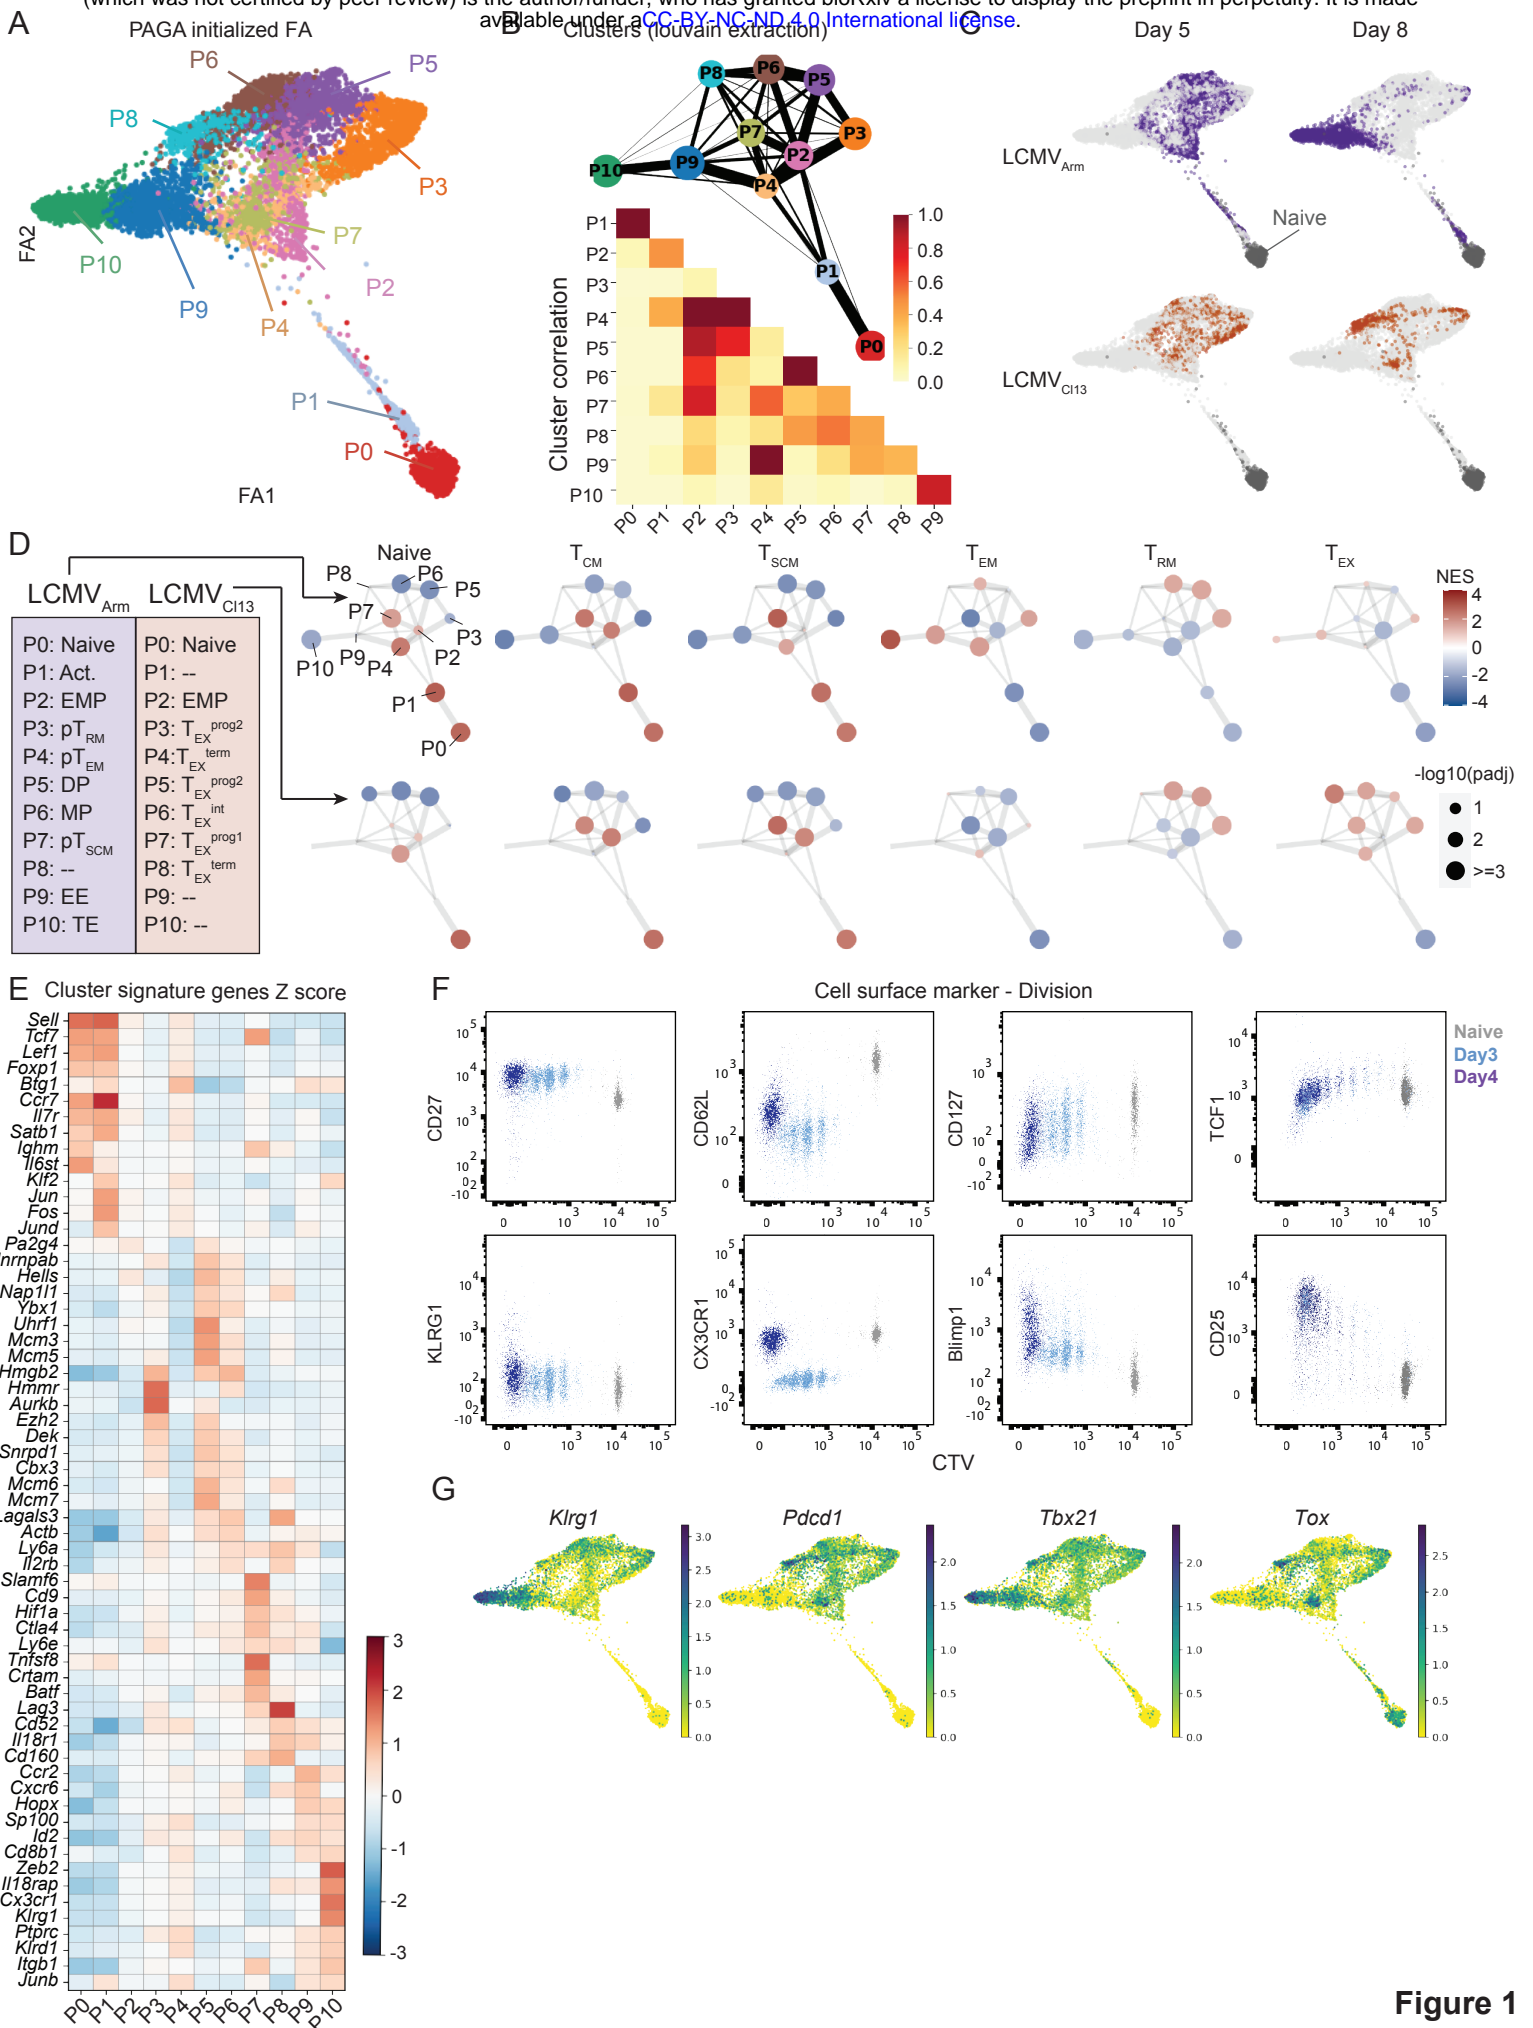

Figure 1

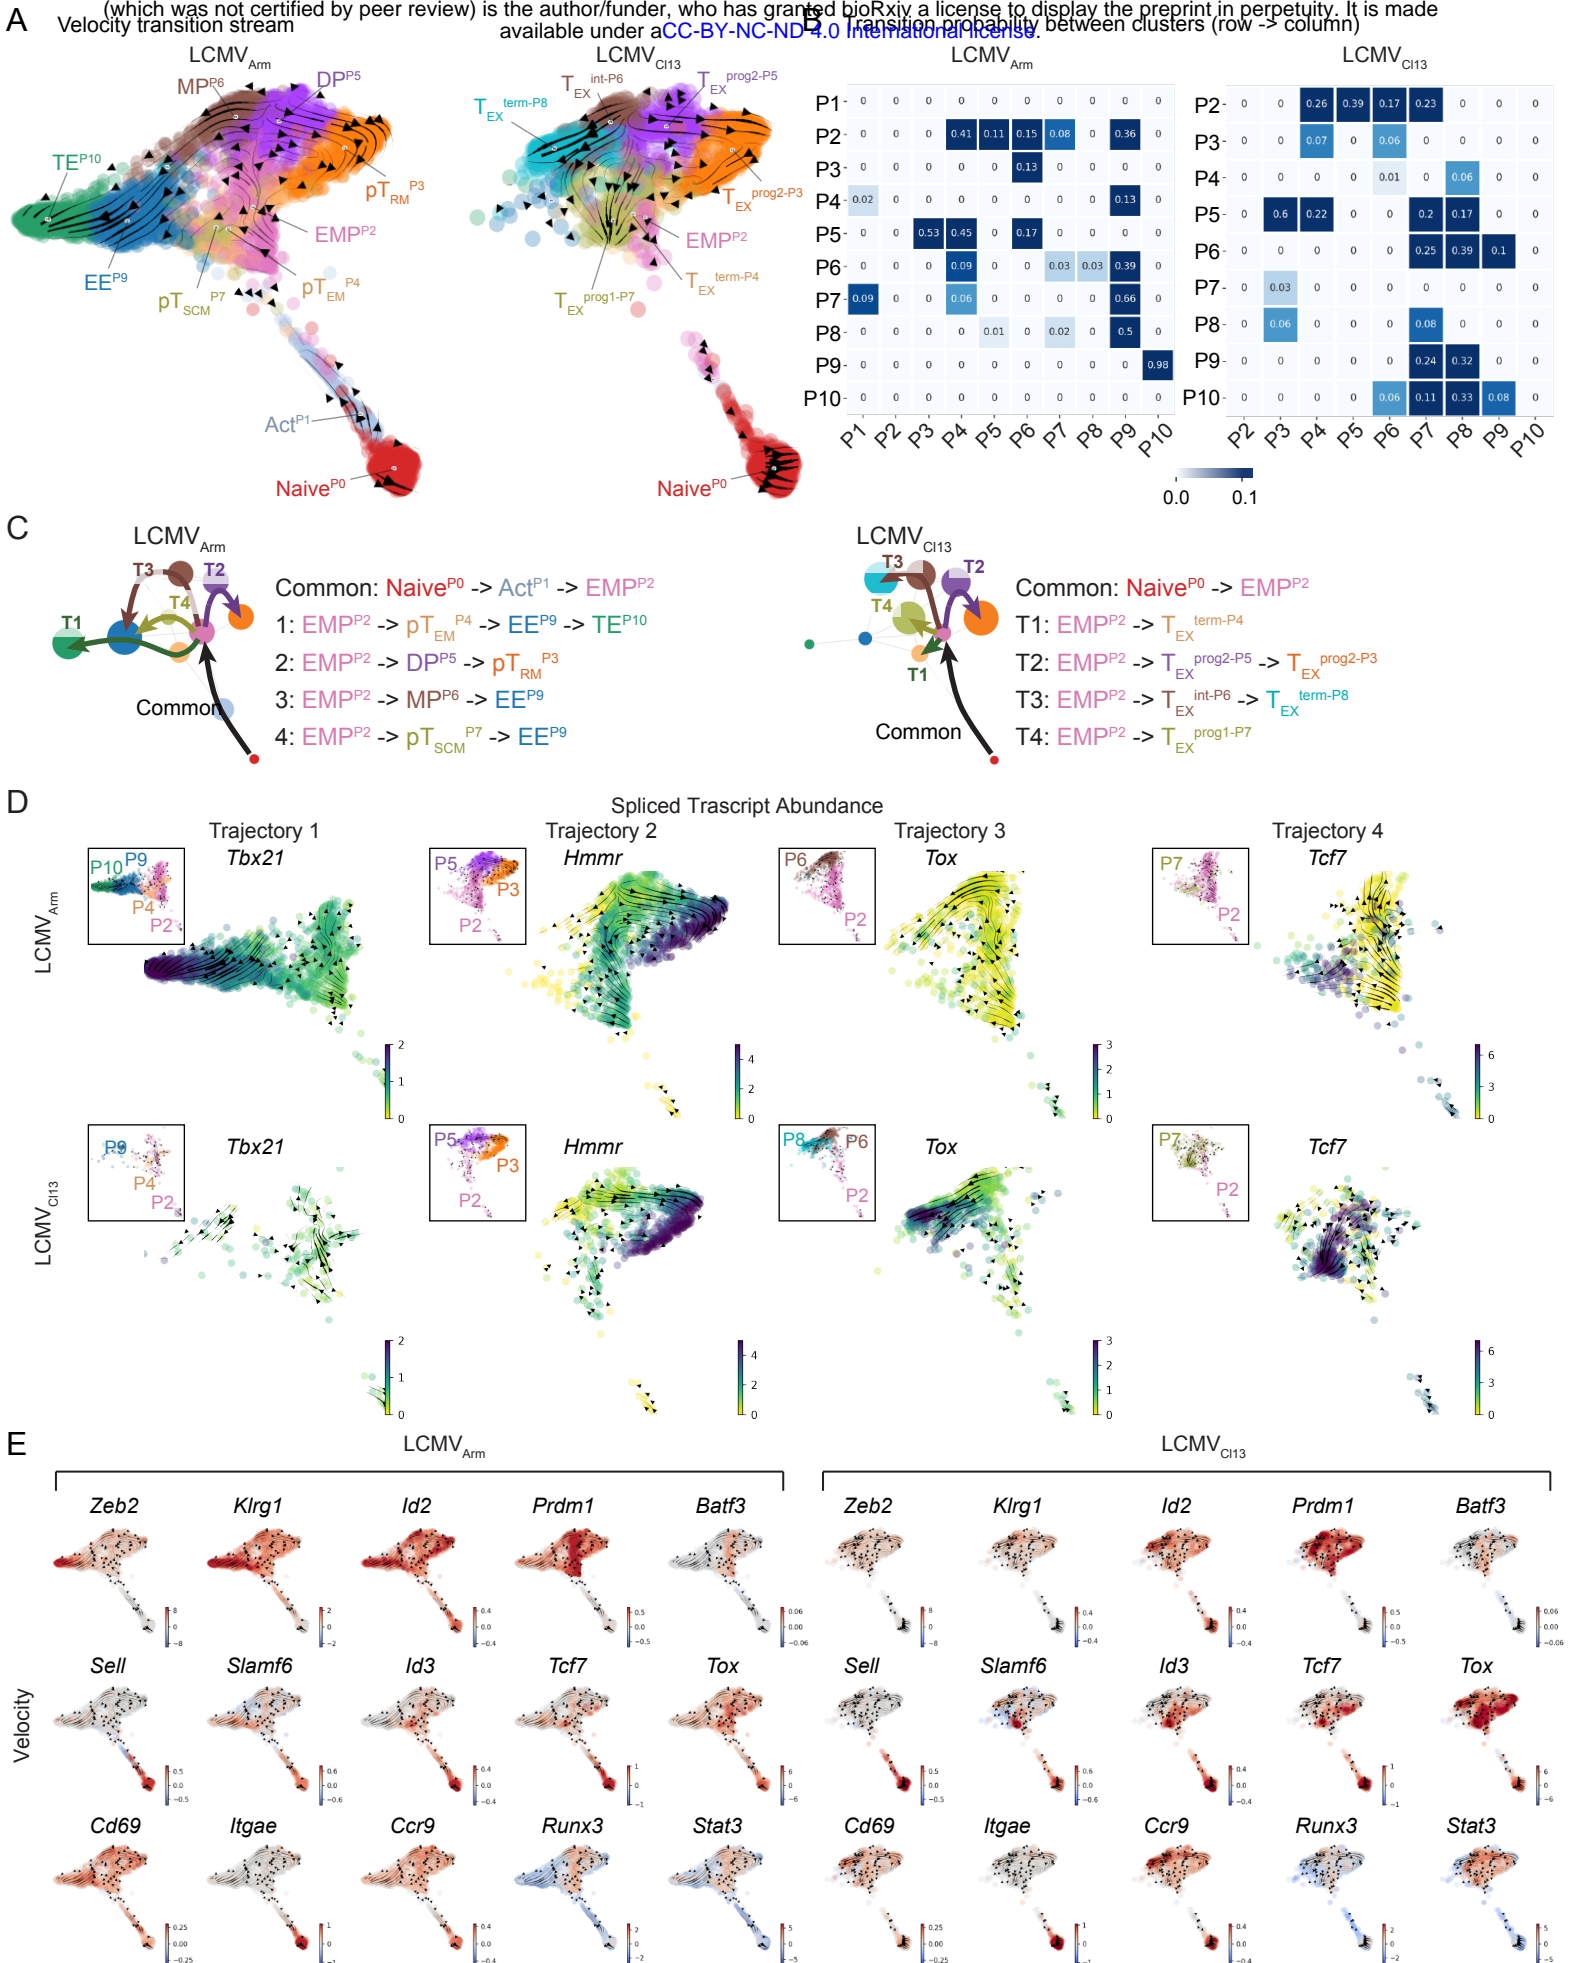

Figure 2

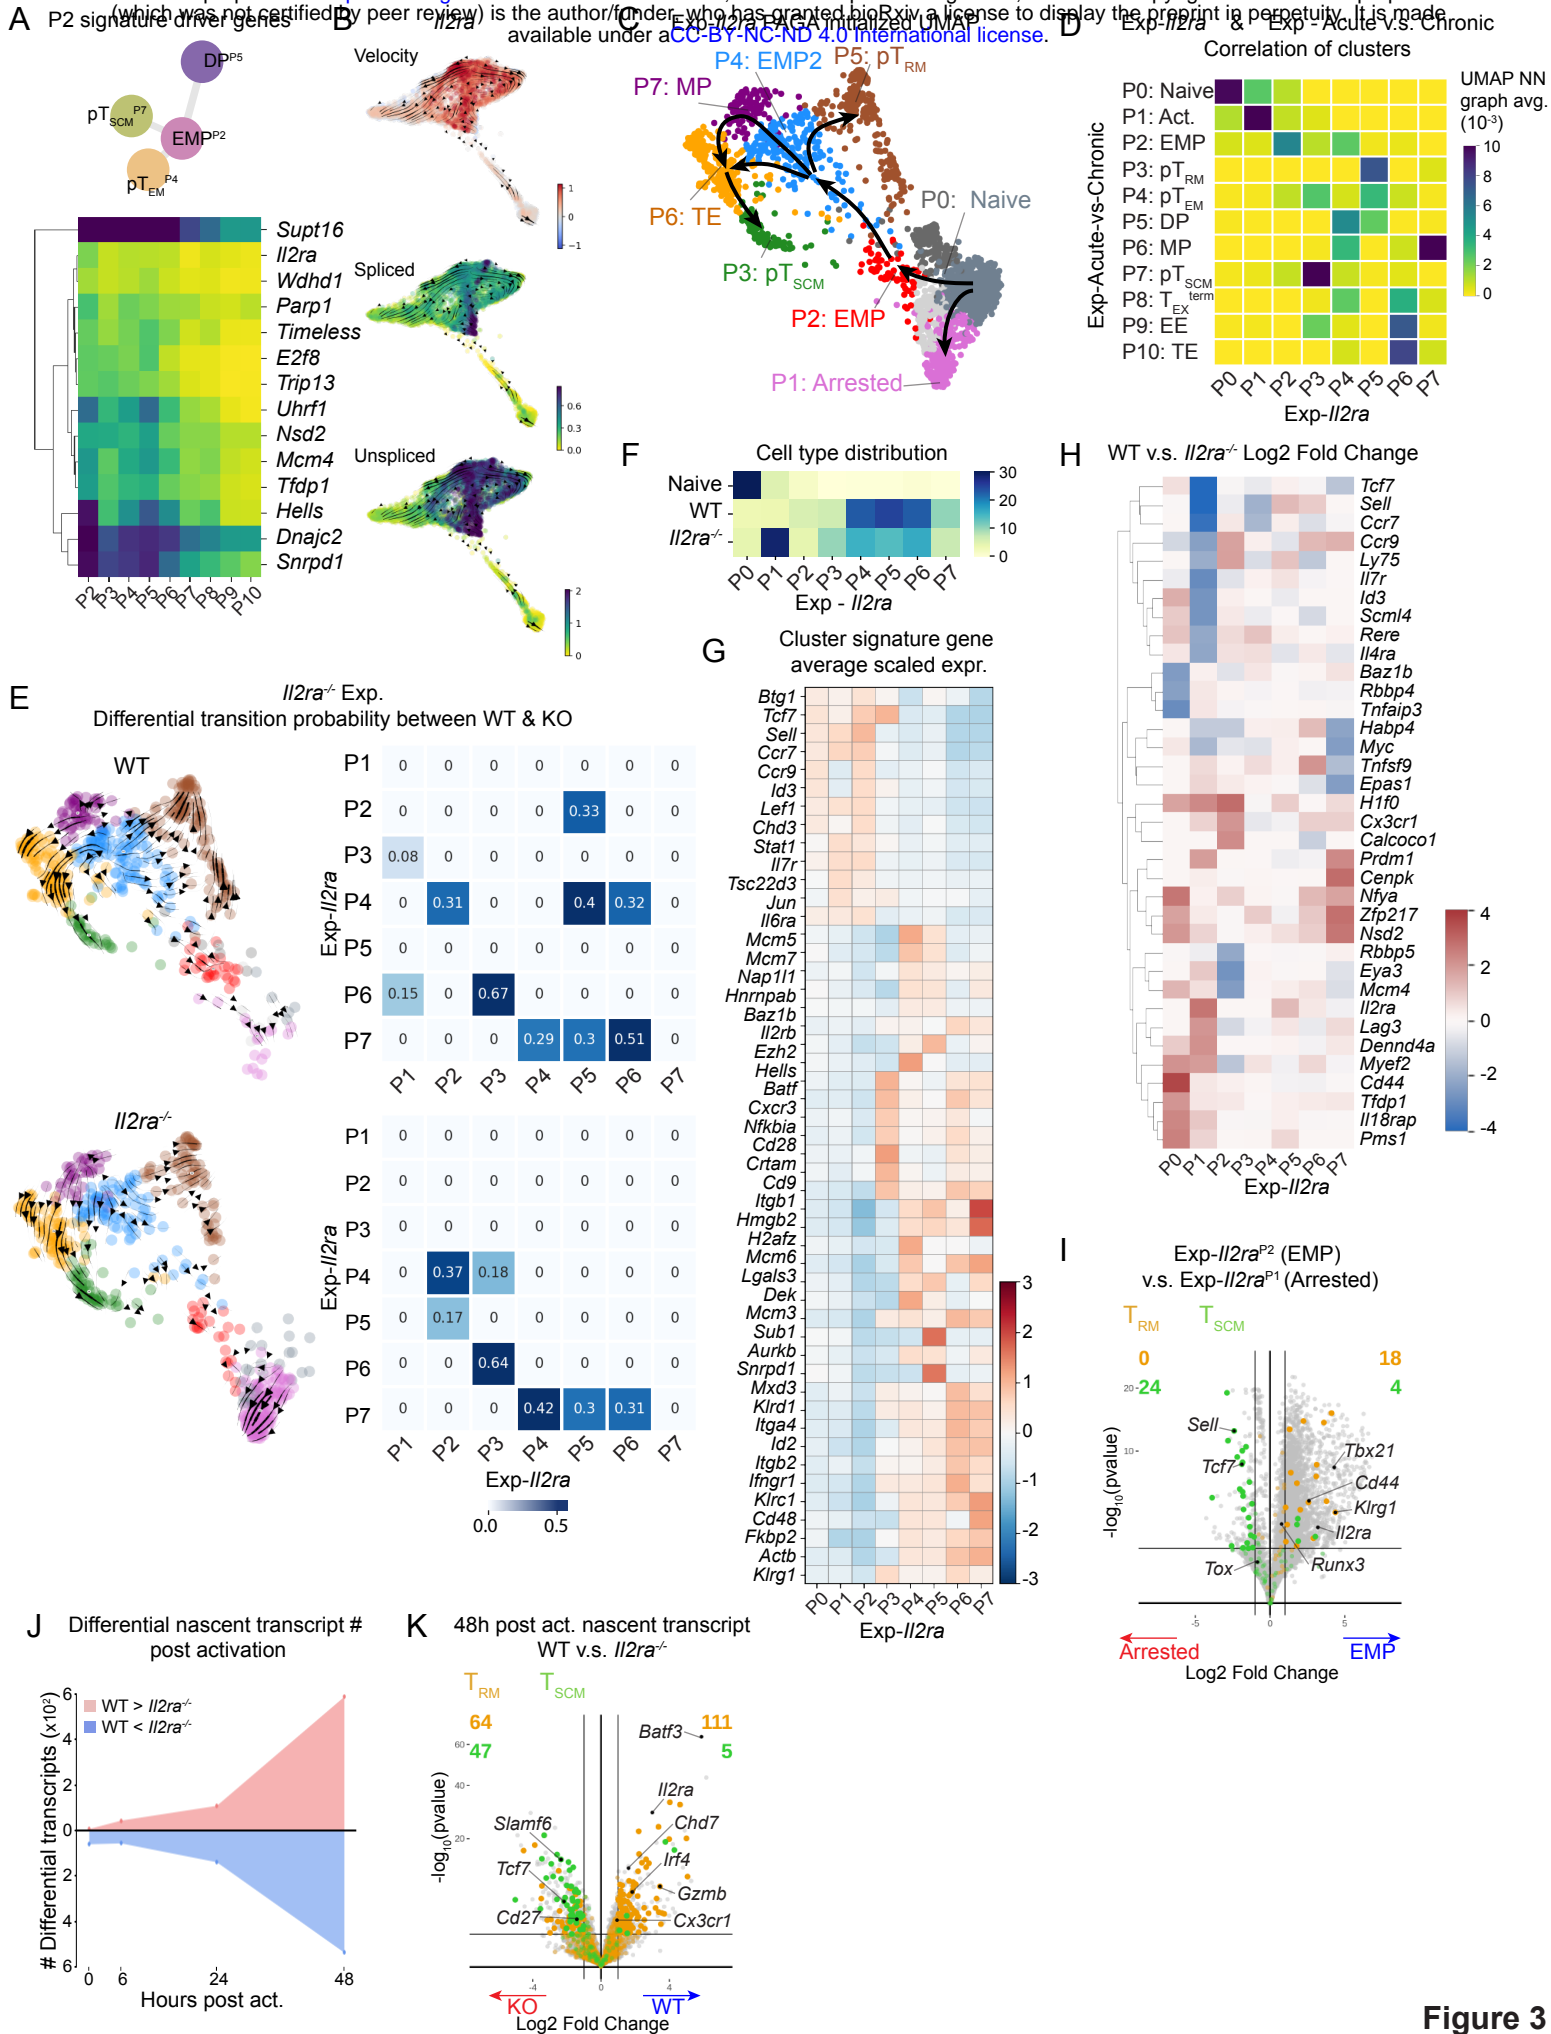

Figure 3

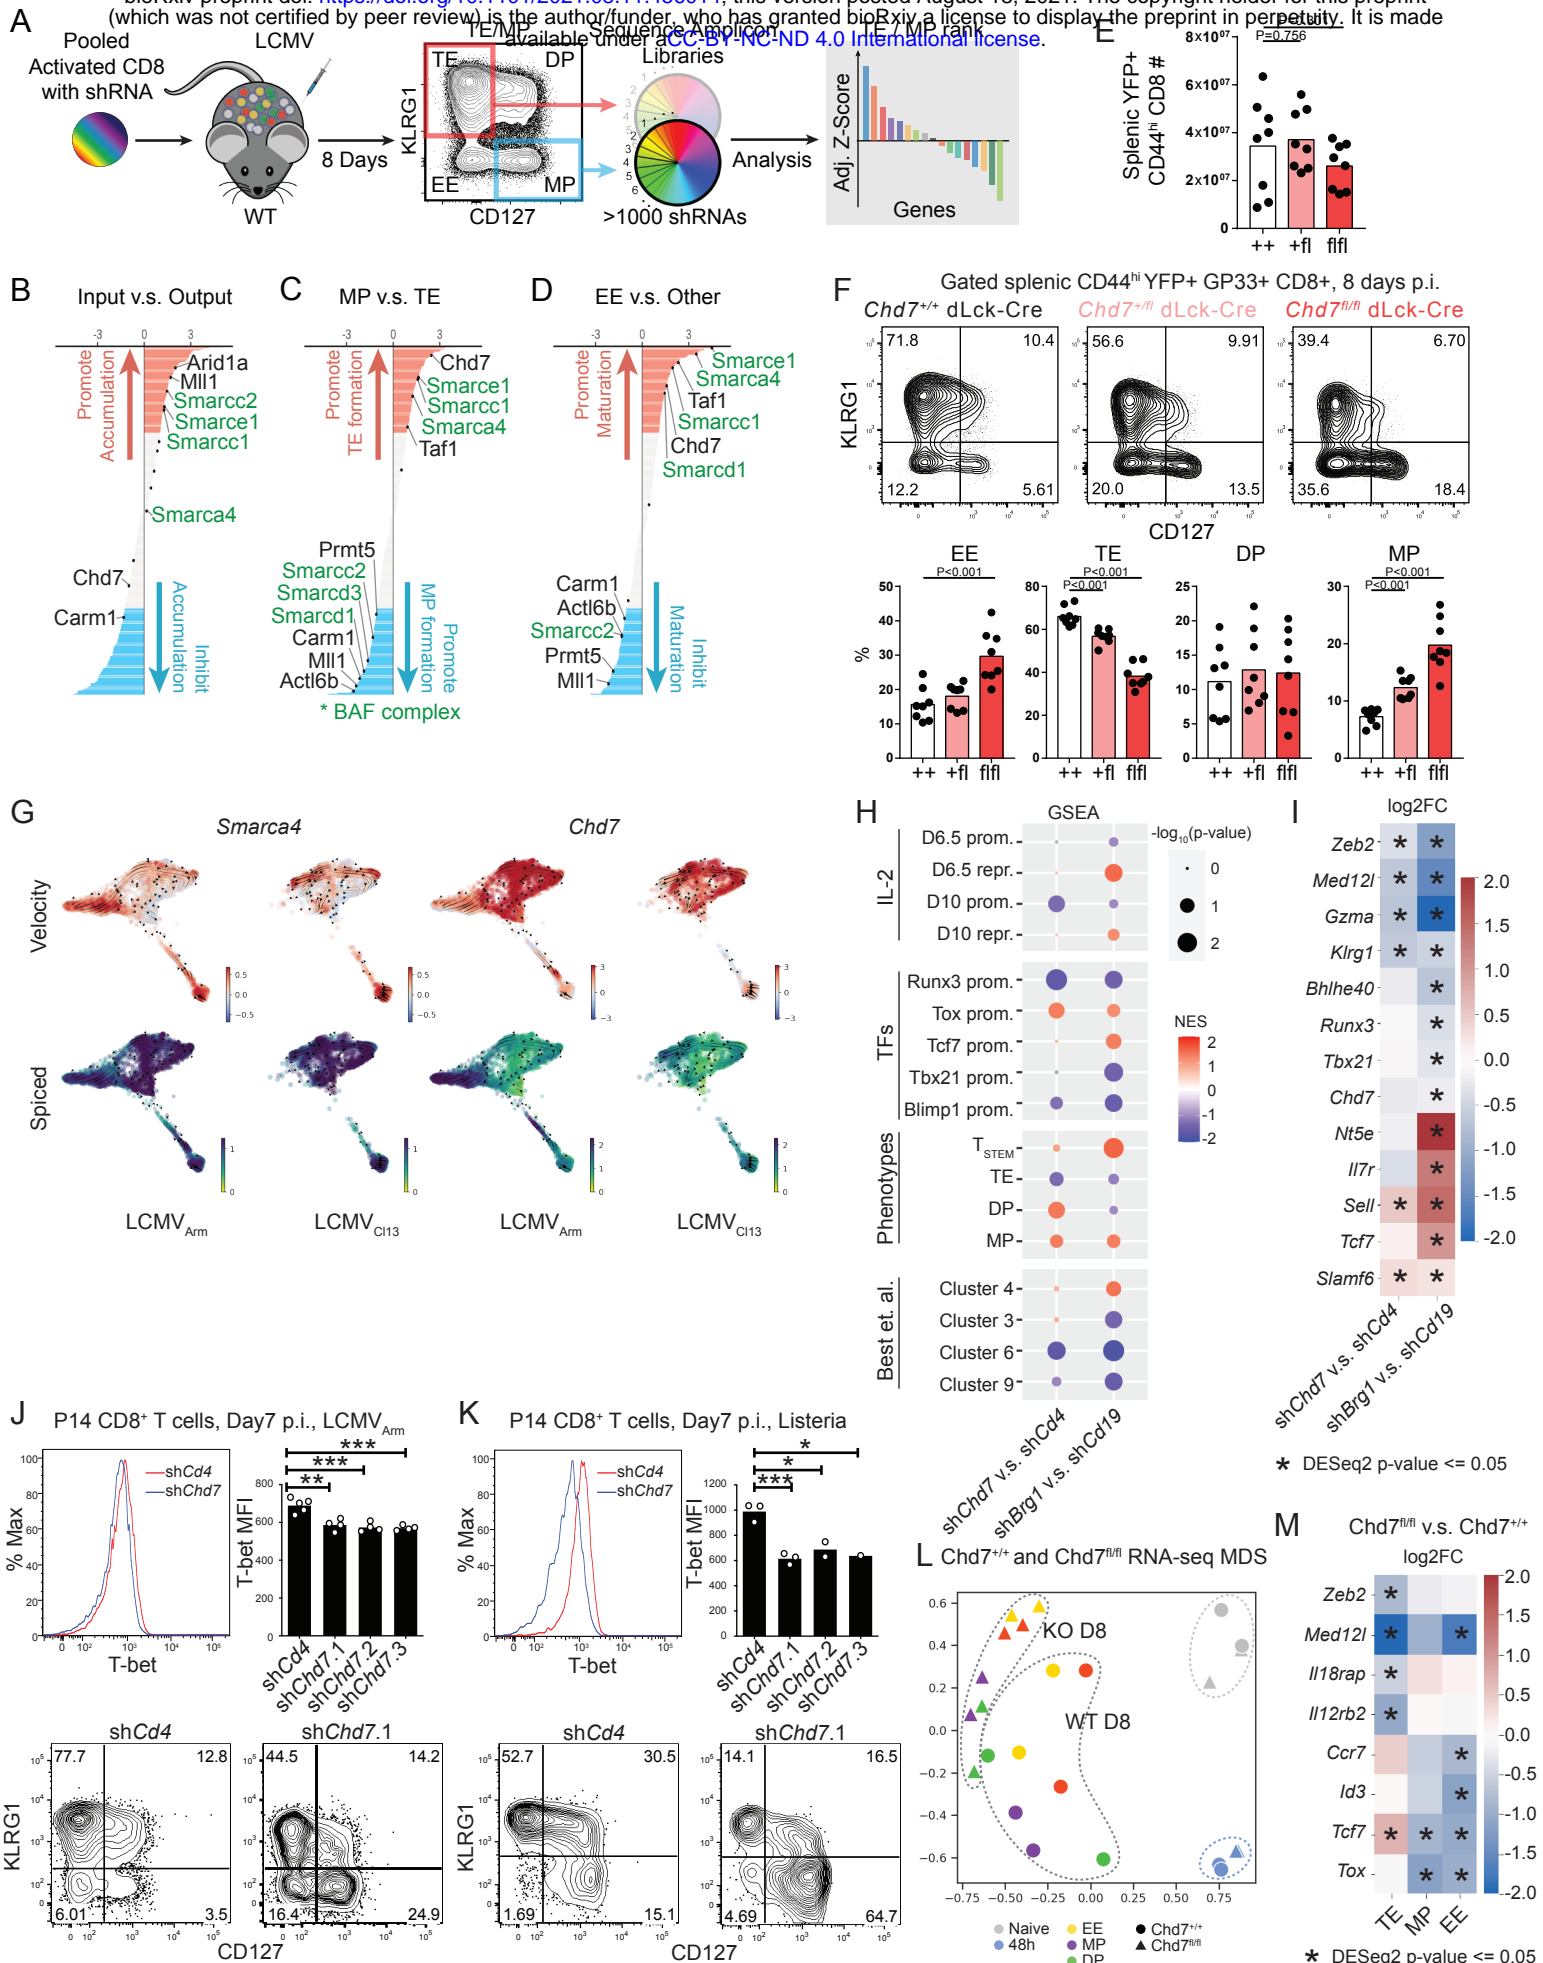

Figure 4

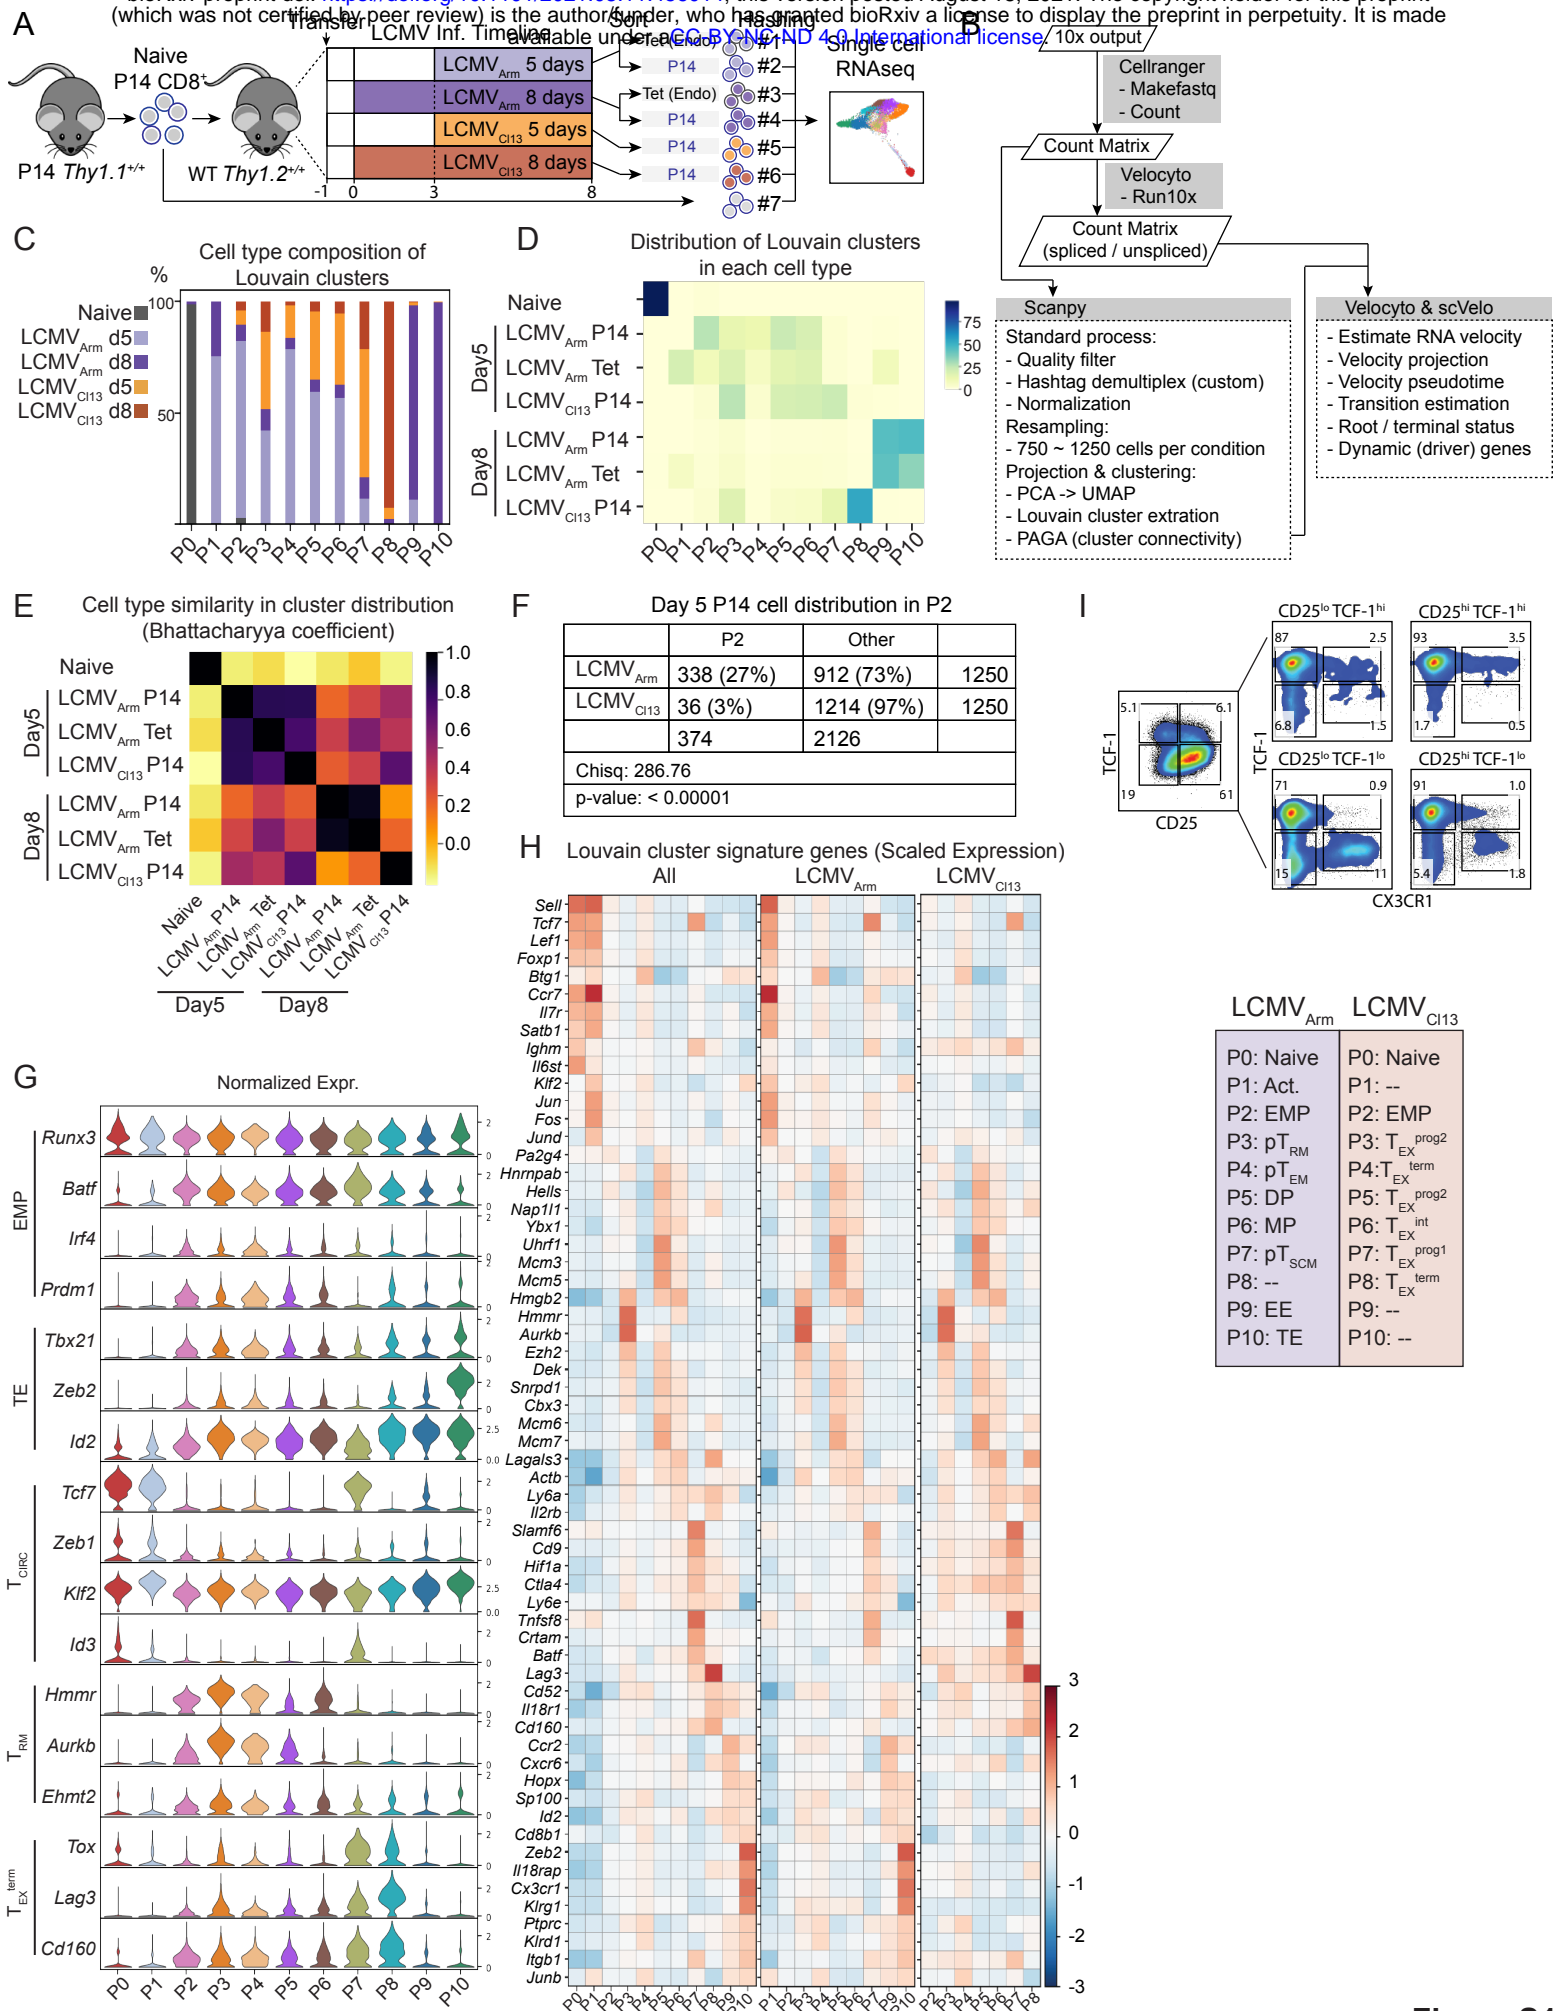

Figure S1

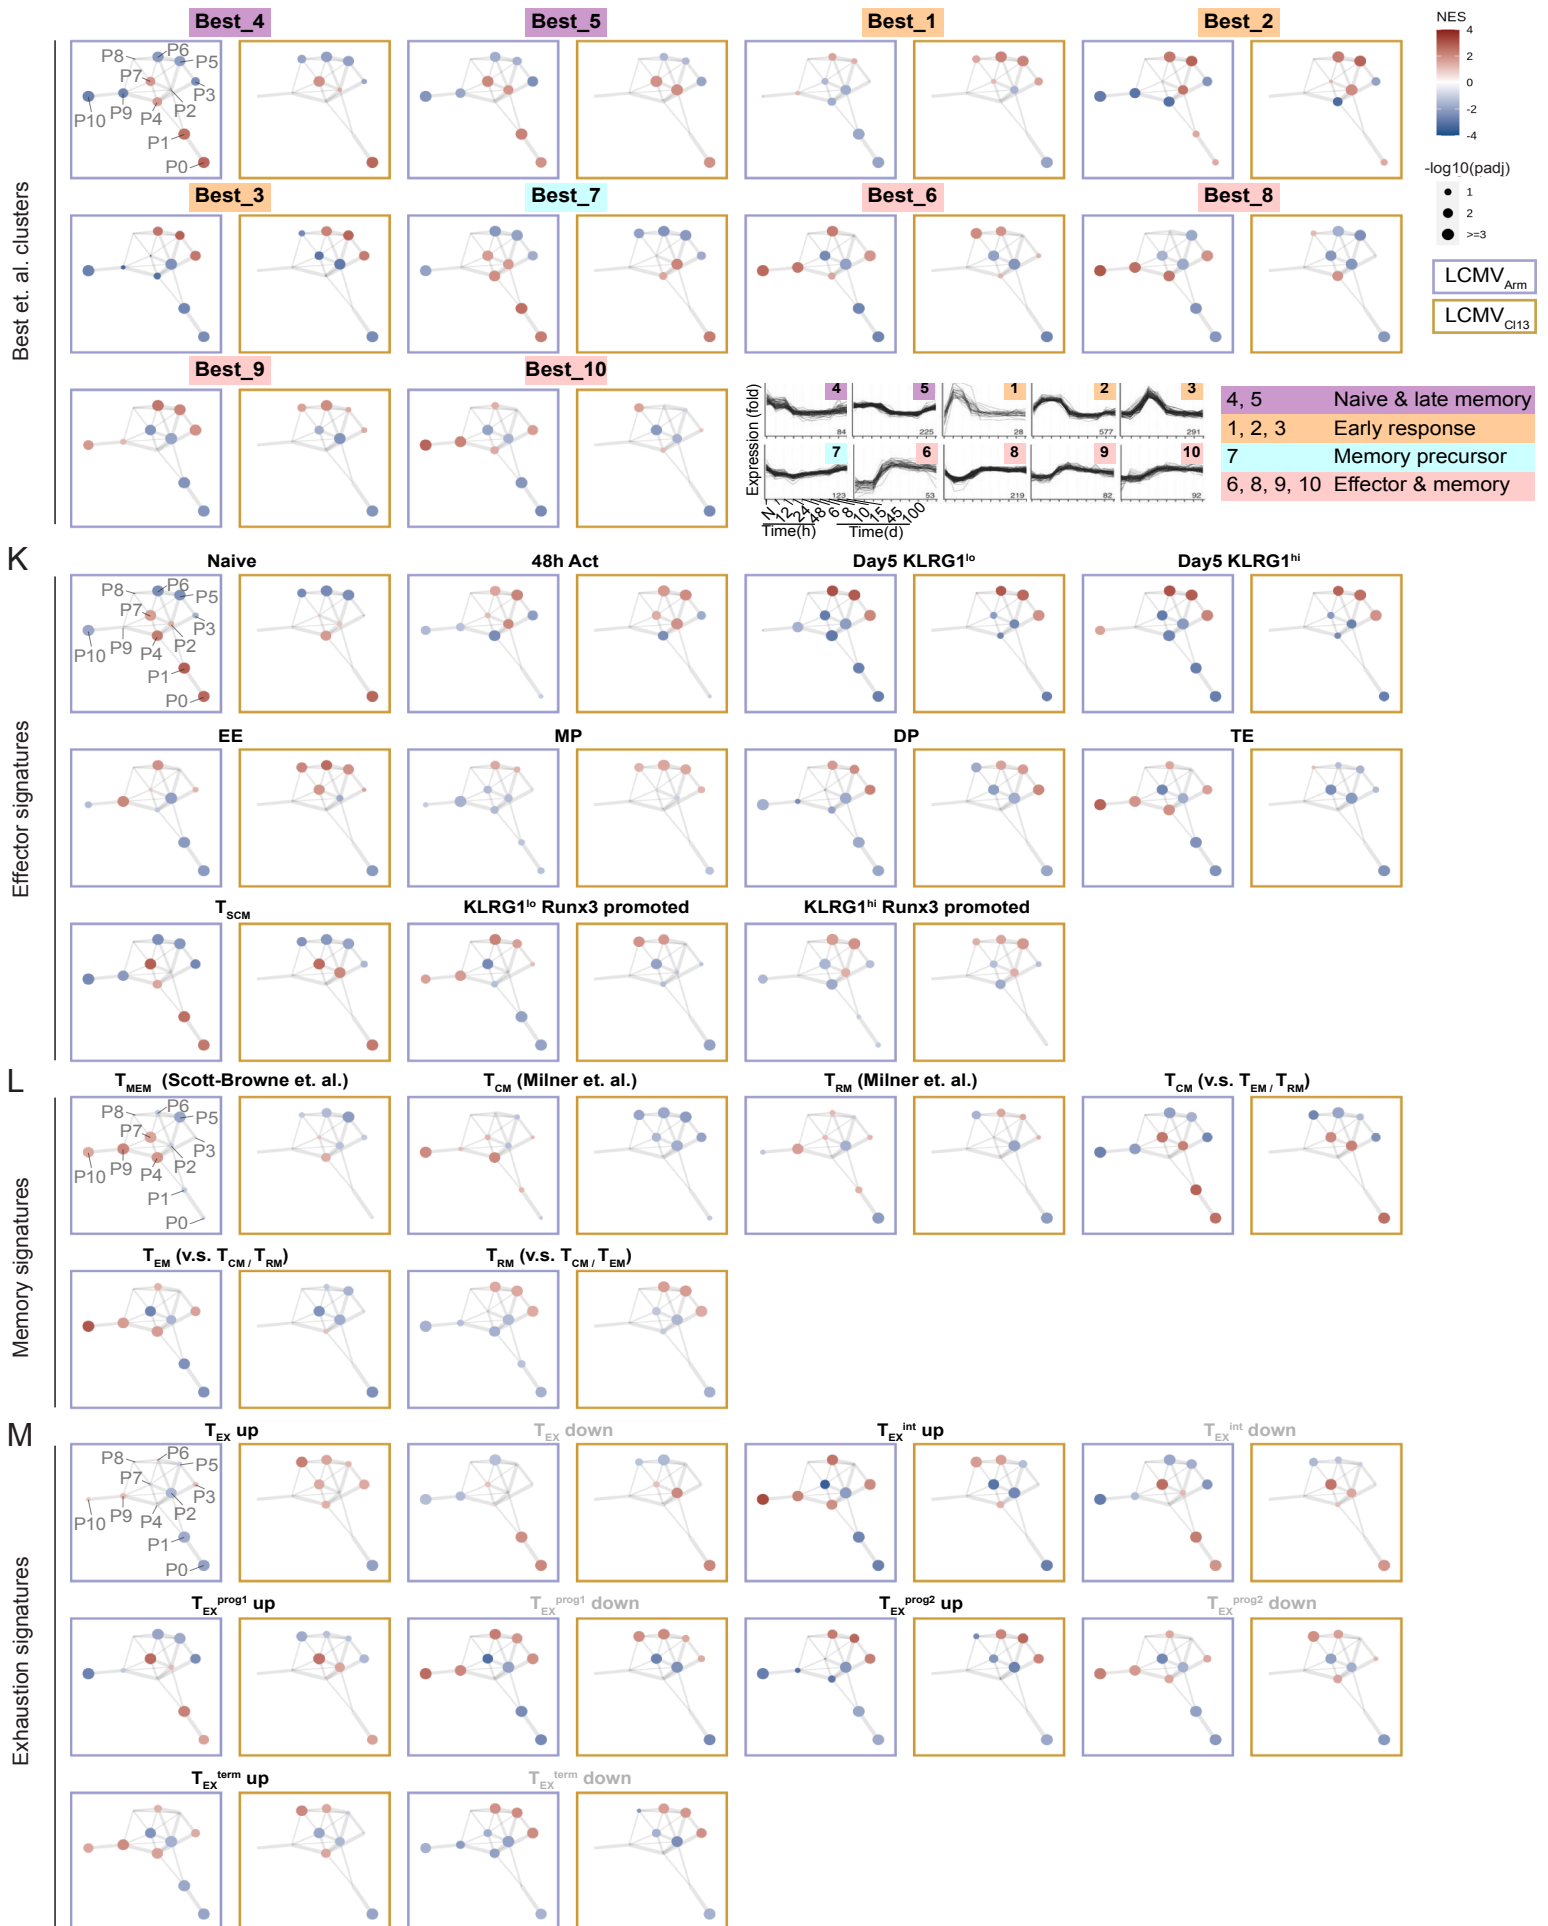

Figure S1



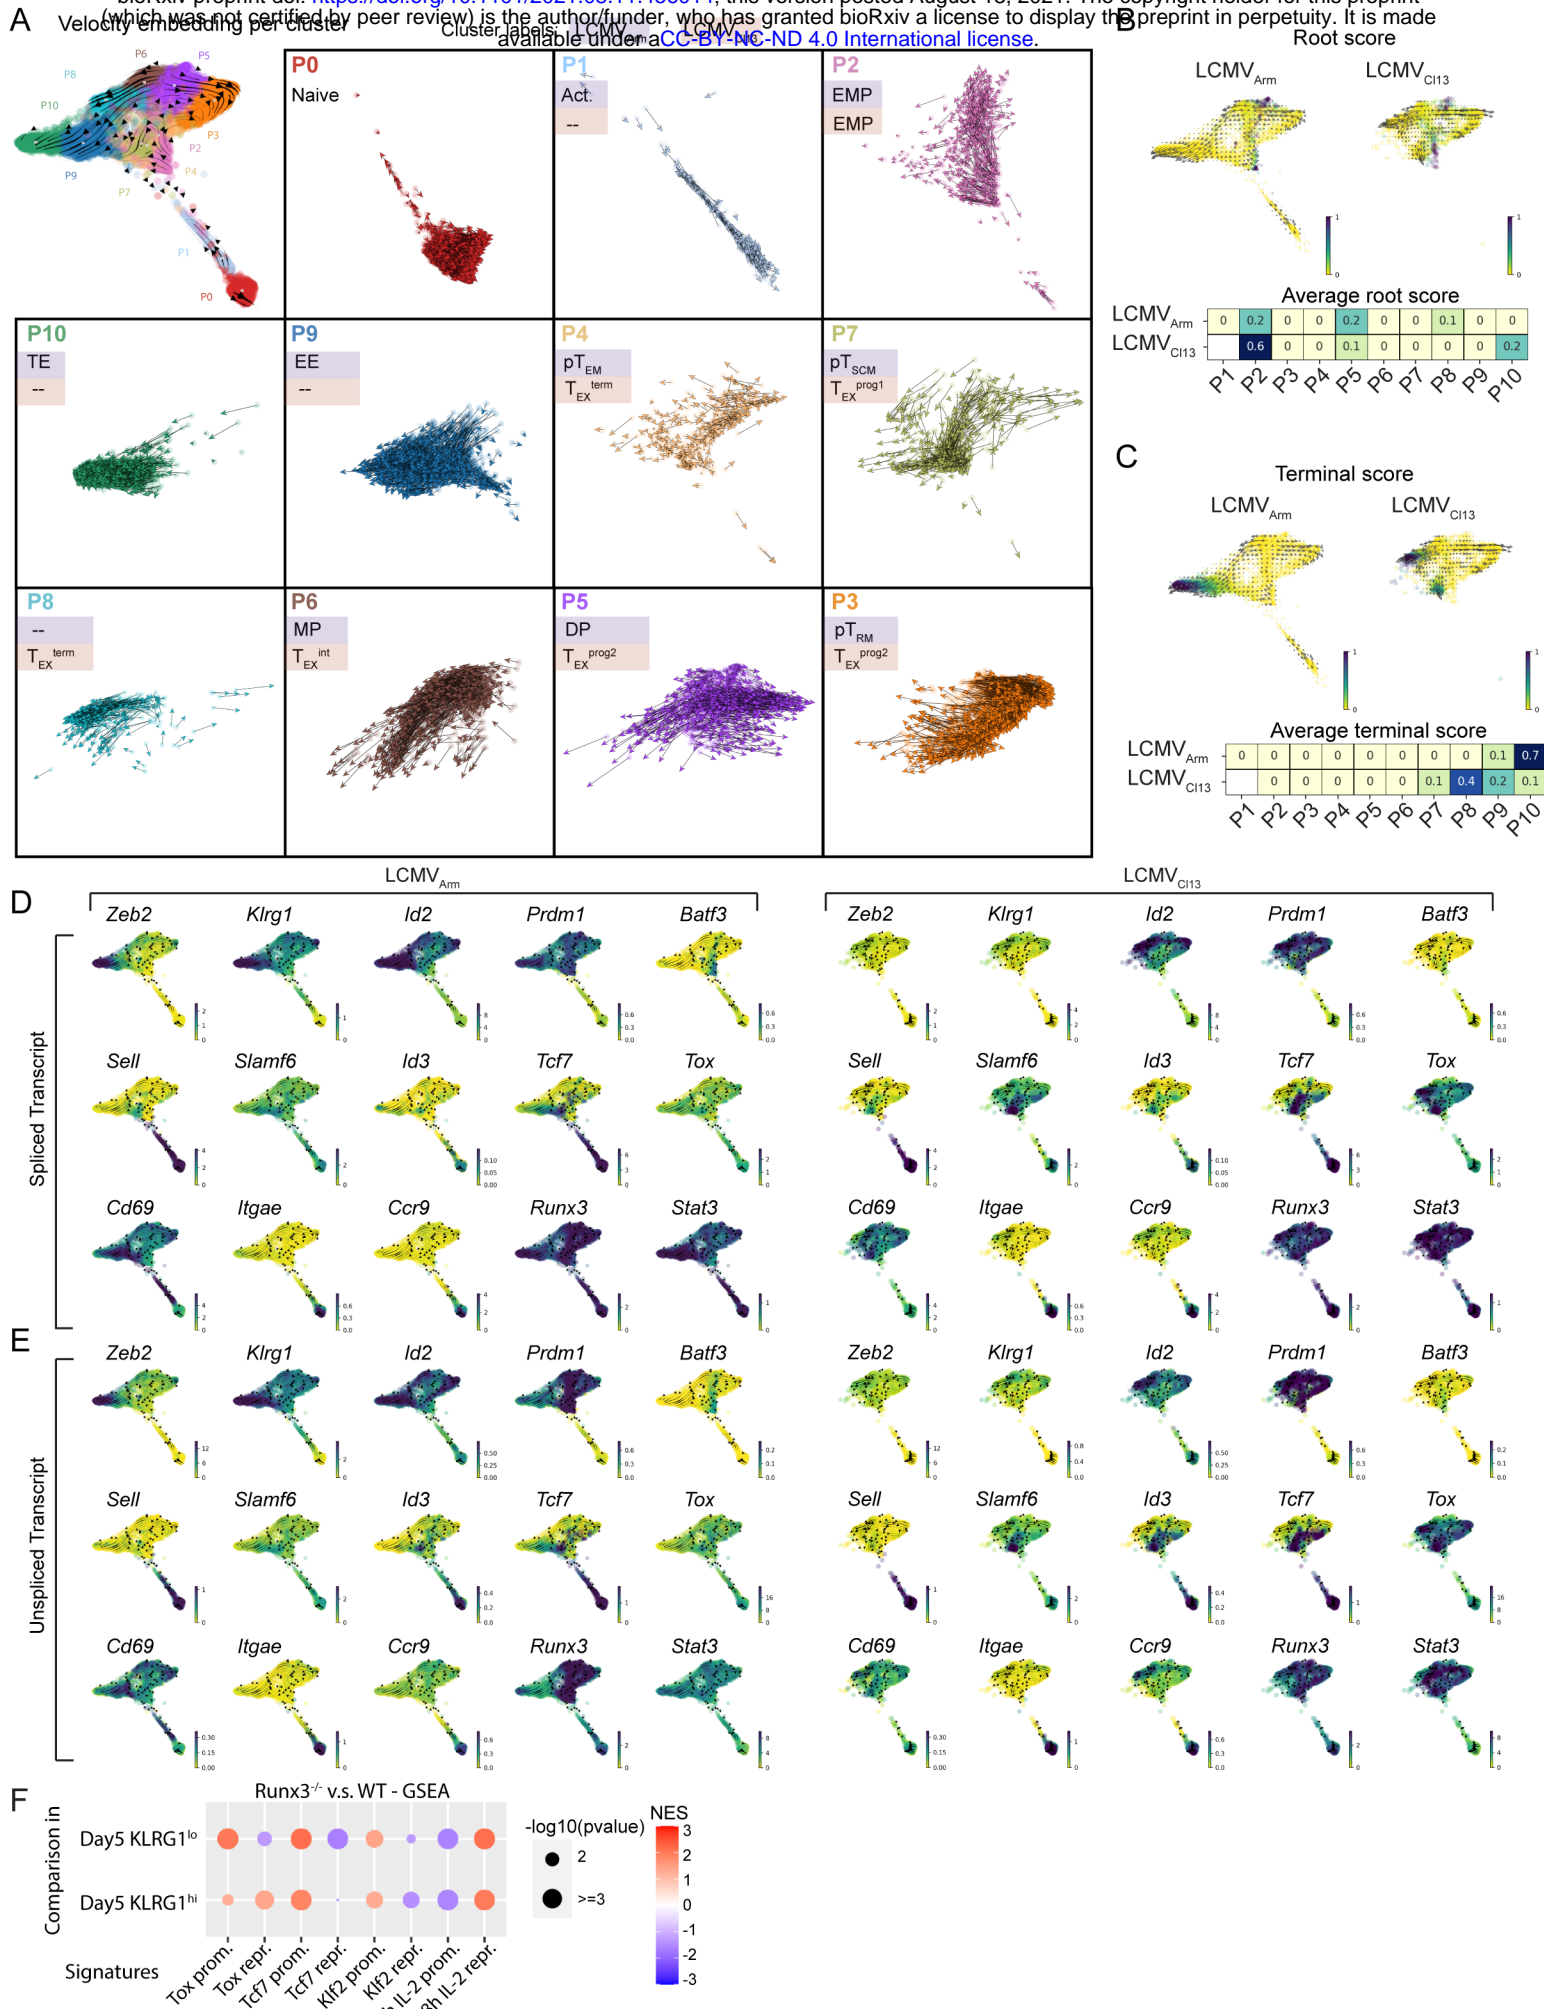

Figure S2

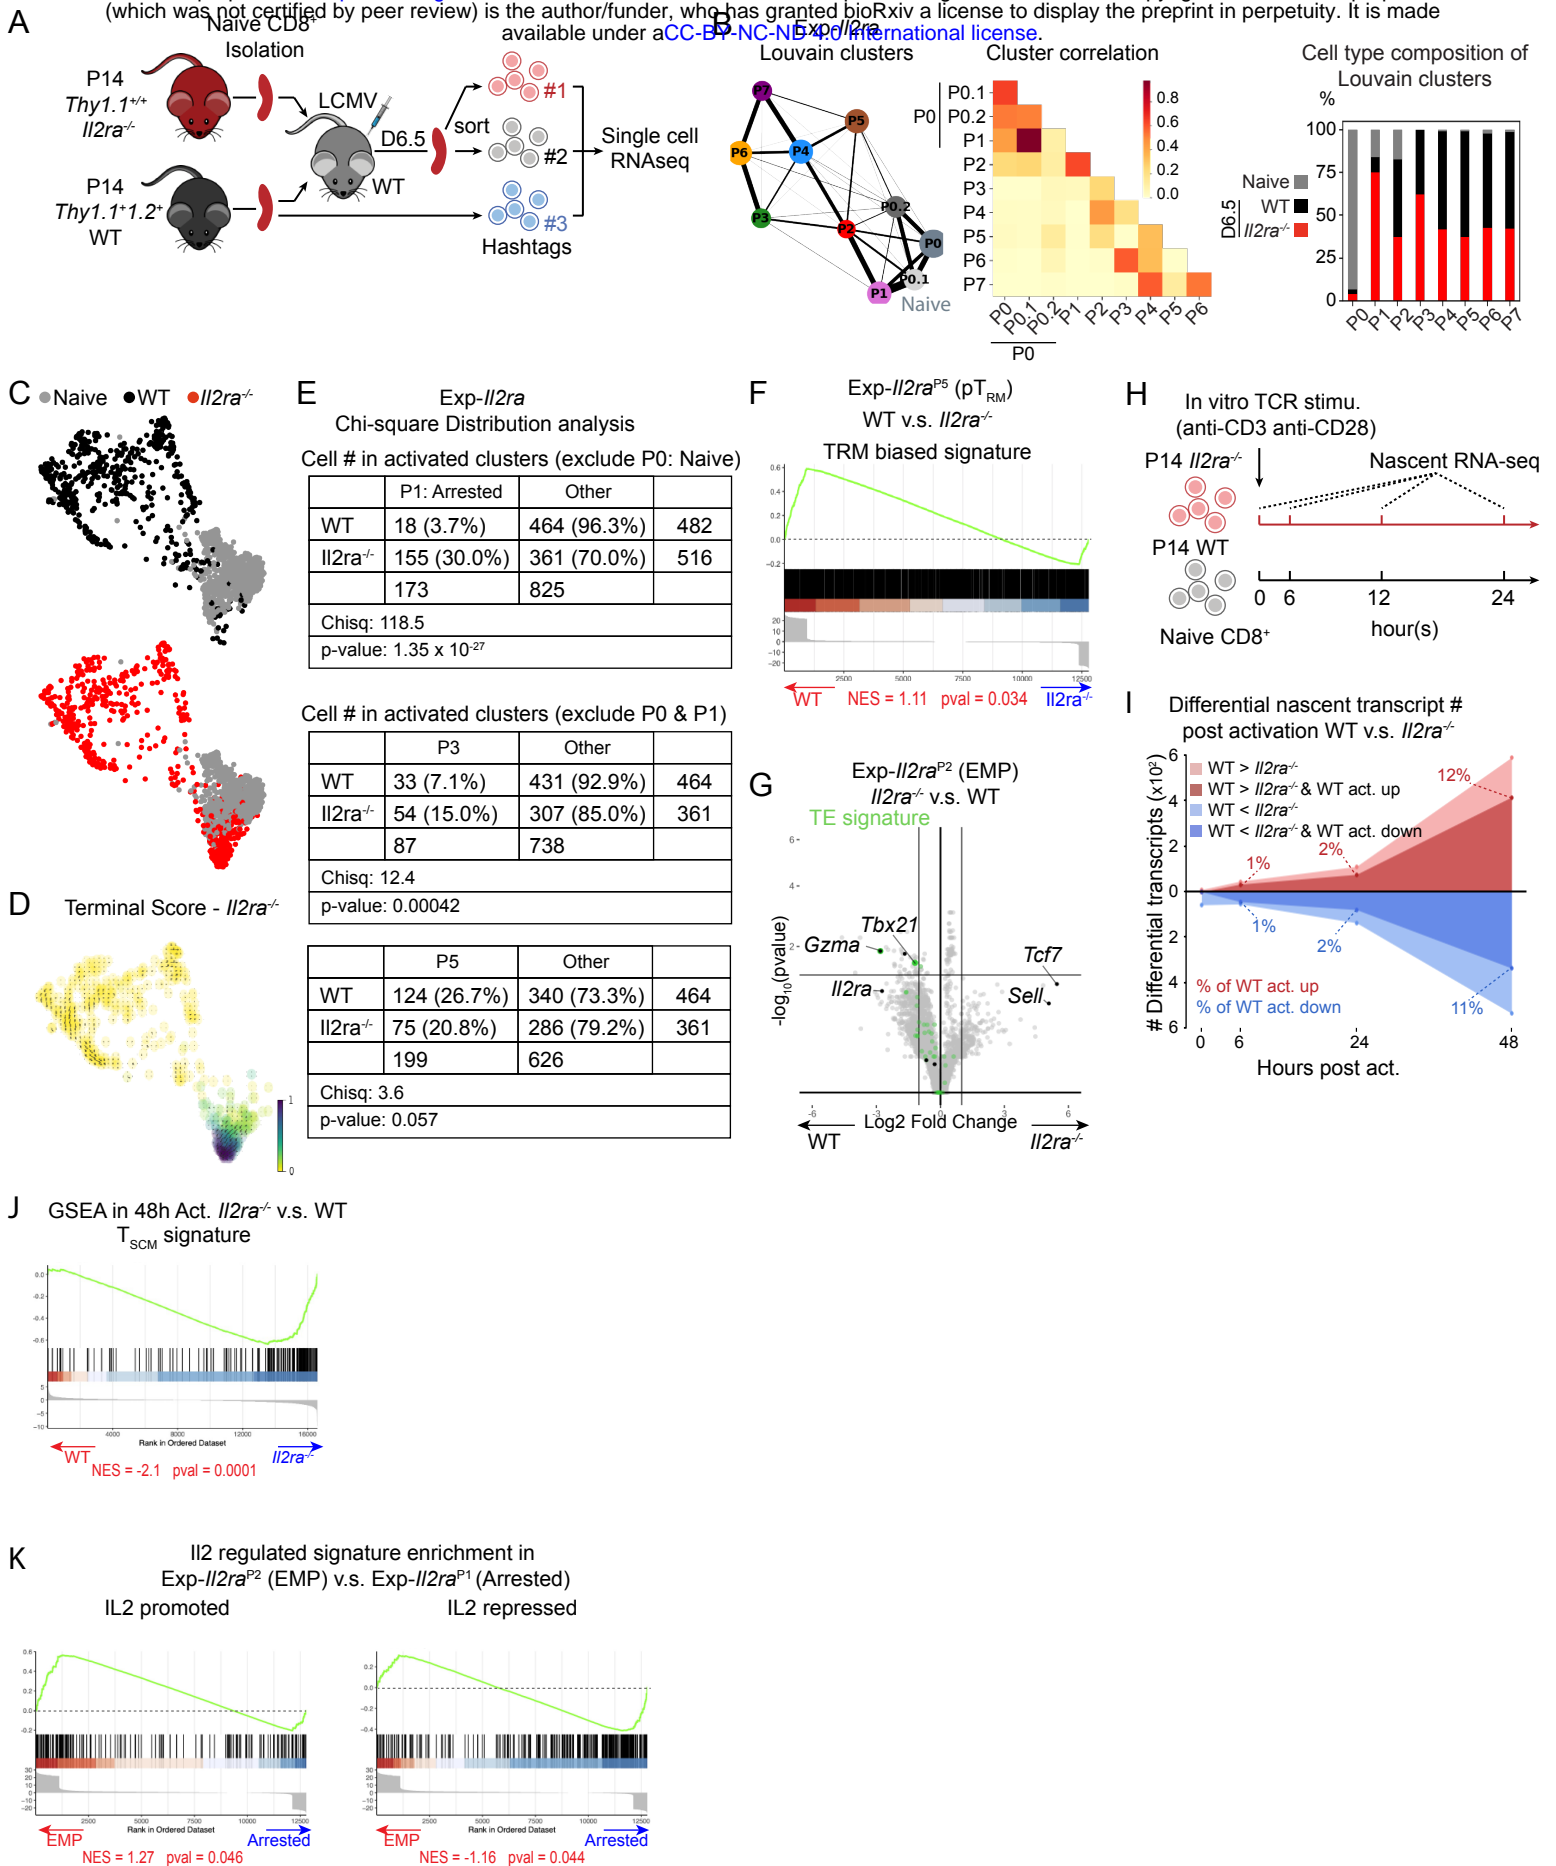

Figure S3

L

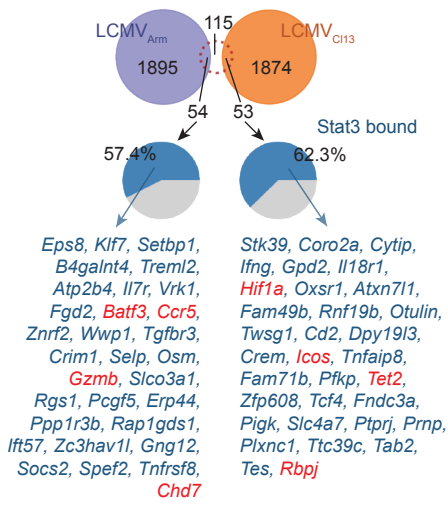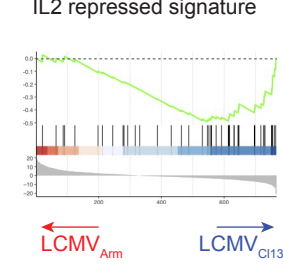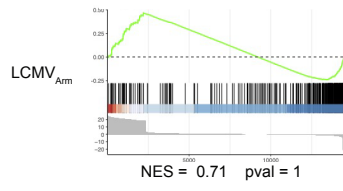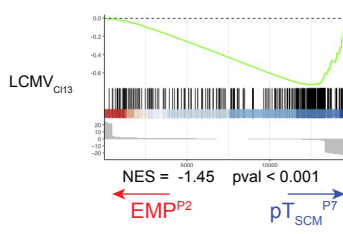

IL2-Stat5 promoted

IL2-Stat5 repressed

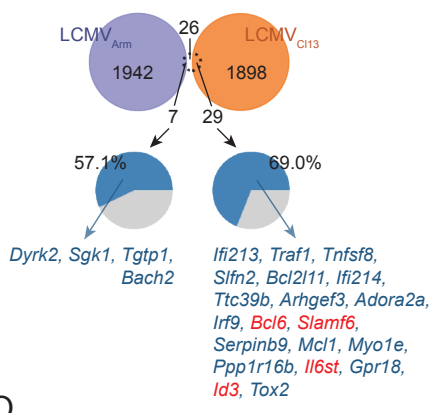

O

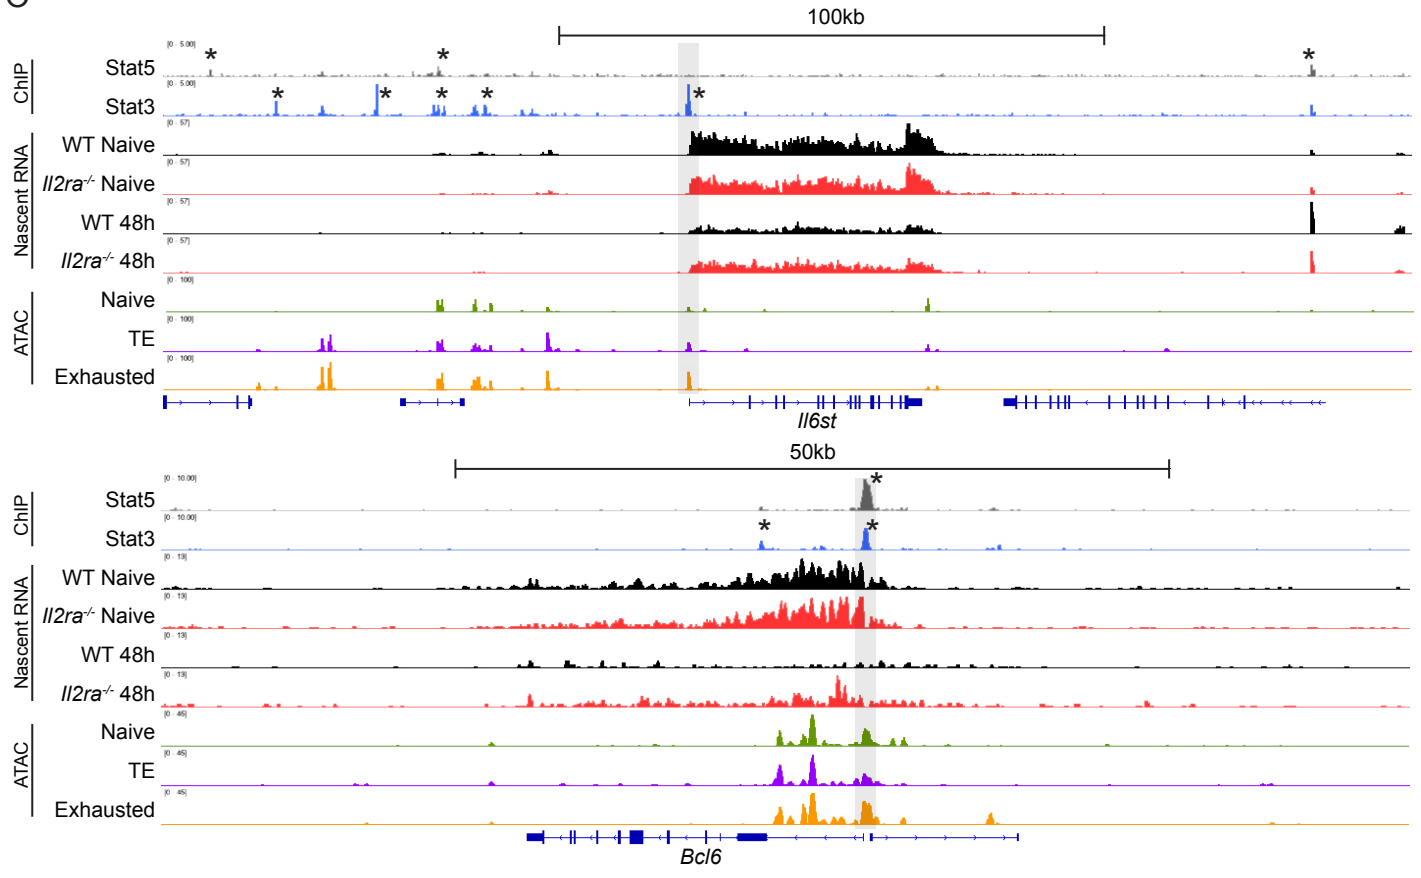

Figure S3

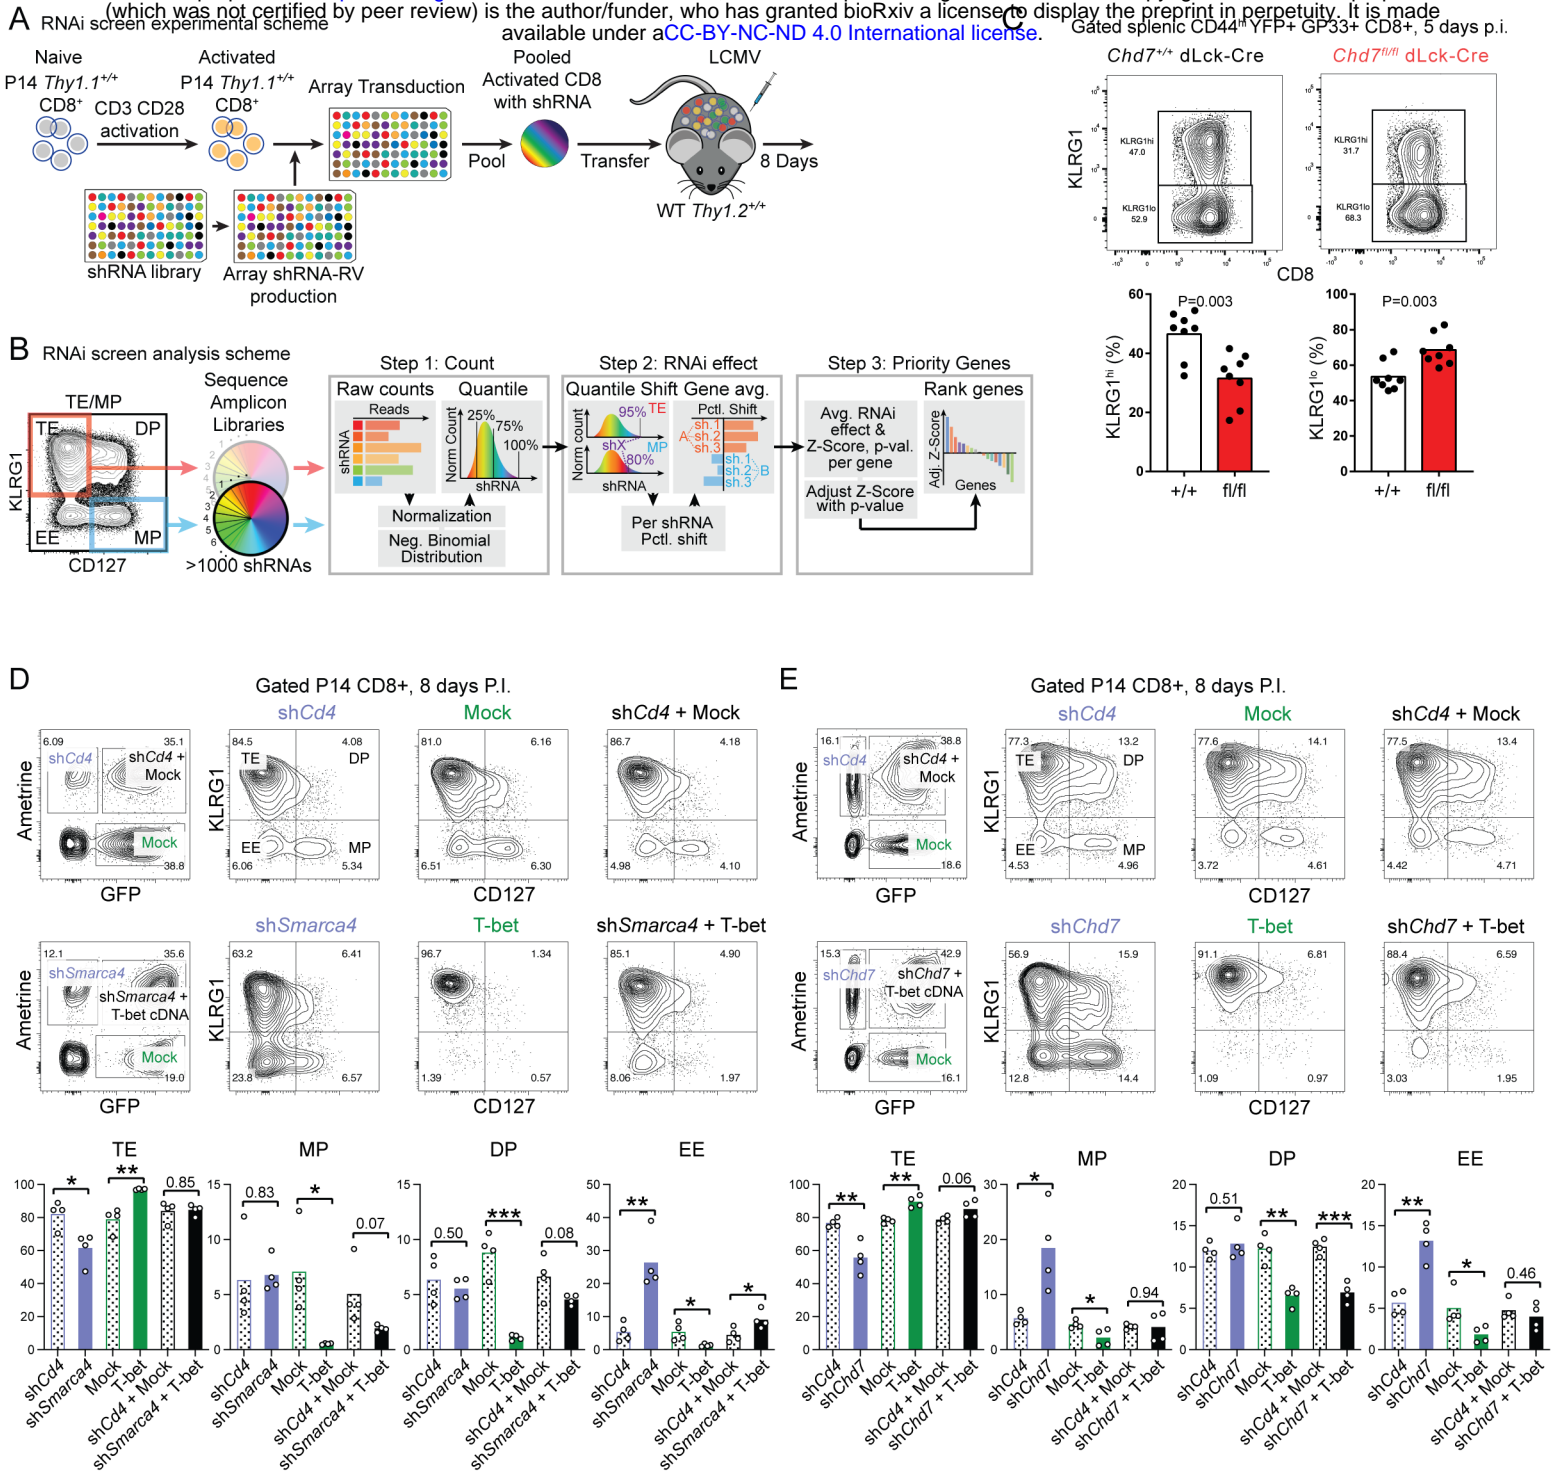

Figure S4

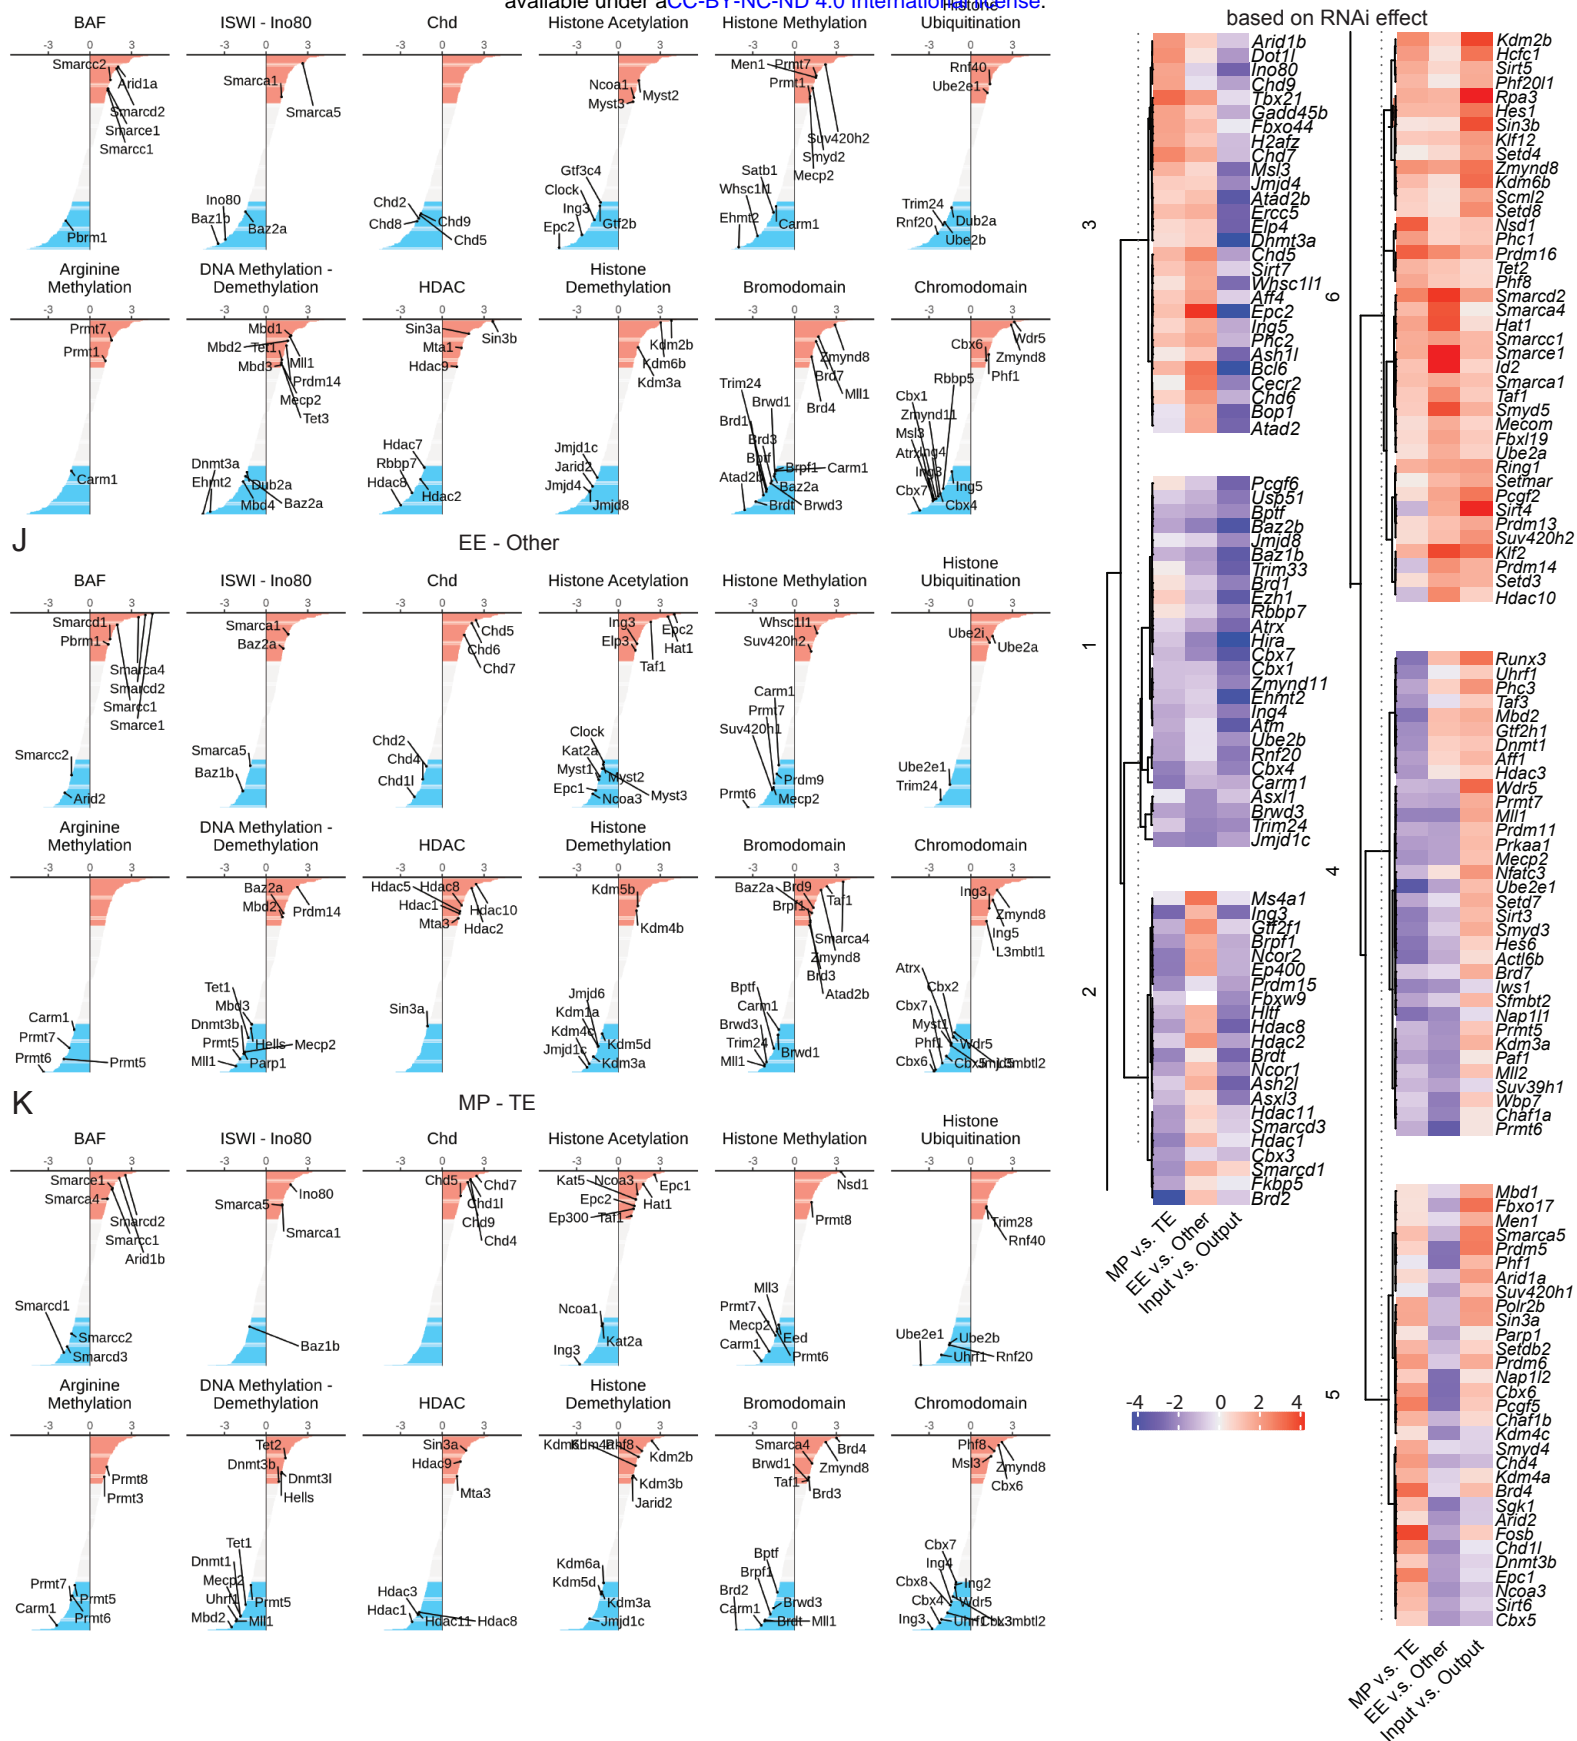

Figure S4

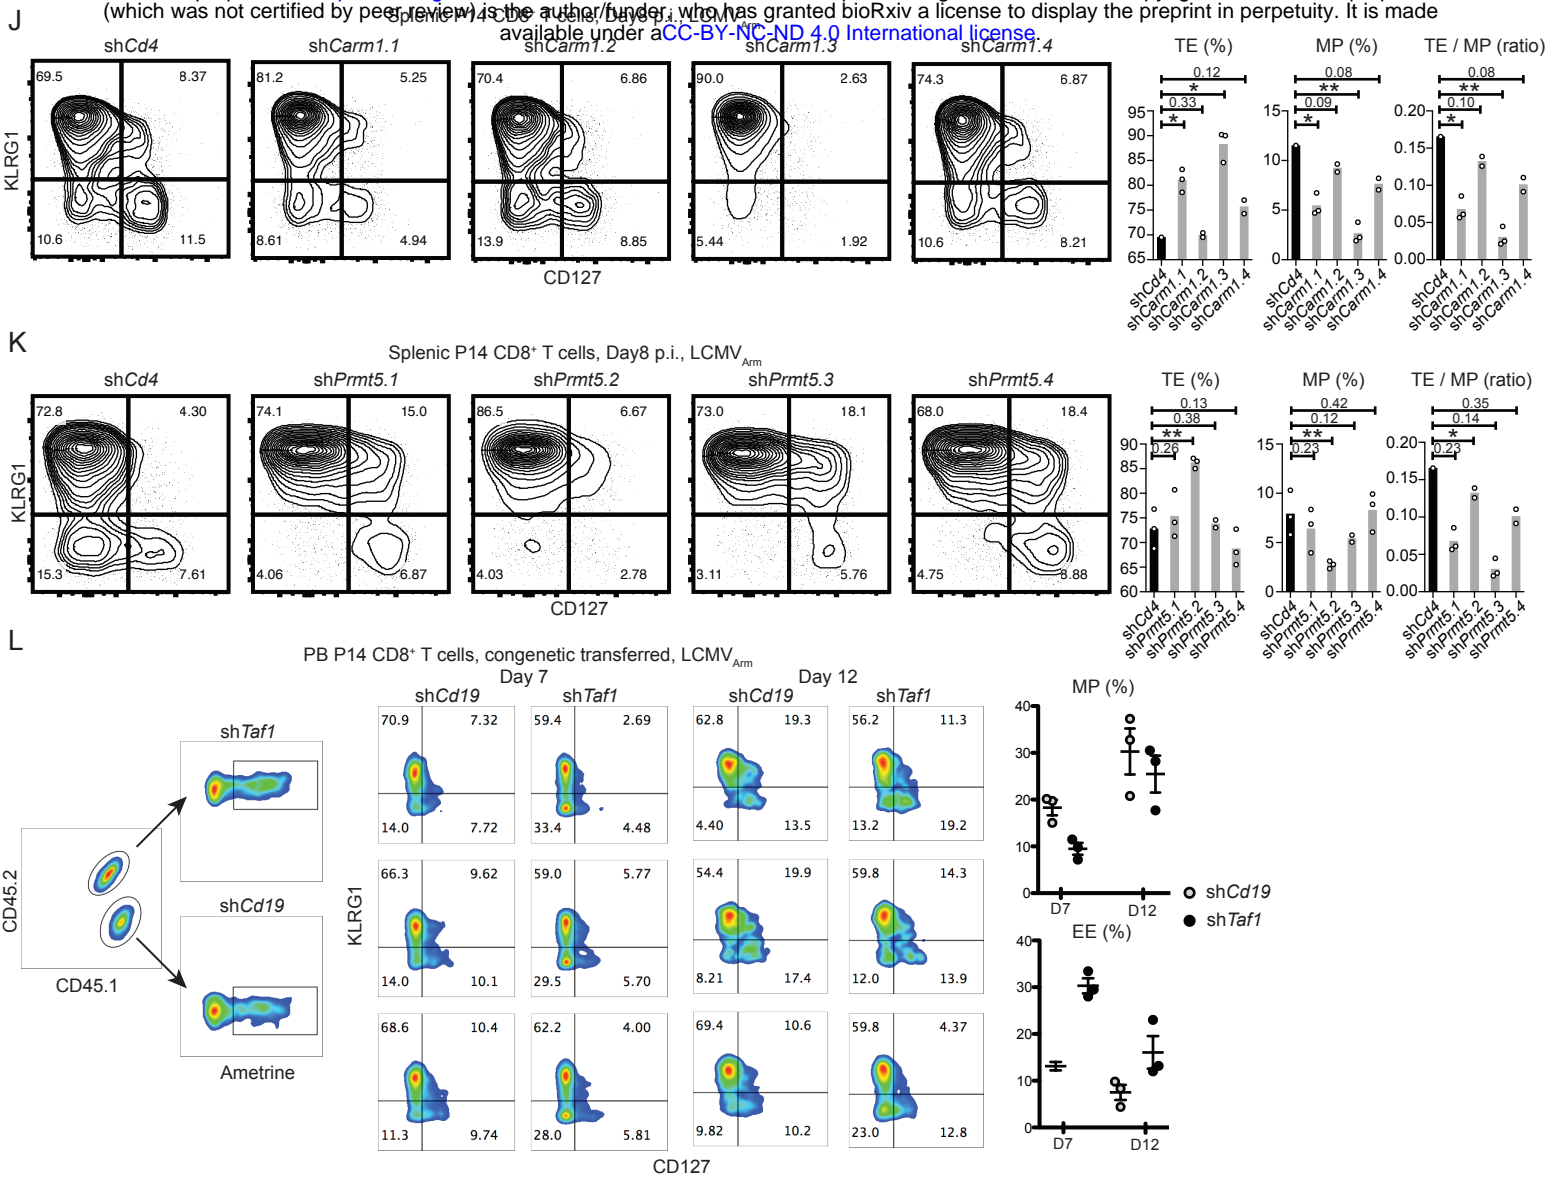

Source: https://www.biorxiv.org/content/biorxiv/early/2021/08/18/2021.08.11.456014.full.pdf
